1  
2  
3  
4  
5  
6  
7  
8  
9  
10  
11  
12  
13  
14  
15  
16  
17  
18  
19  
20  
21  
22

# **The RNA helicase DDX6 controls early mouse embryogenesis by repressing aberrant inhibition of BMP signaling through miRNA-mediated gene silencing**

**Short title:** The role of DDX6 in early mouse embryogenesis

## **Authors**

Jessica Kim<sup>1</sup>, Masafumi Muraoka<sup>2</sup>, Rieko Ajima<sup>2,3</sup>, Hajime Okada<sup>2</sup>, Atsushi Toyoda<sup>4</sup>, Hiroshi Mori<sup>4</sup>, Yumiko Saga<sup>1,2,3</sup>

## **Affiliations**

1. Department of Biological Sciences, Graduate School of Science, The University of Tokyo, Tokyo, 113-0033, Japan

2. Department of Gene Function and Phenomics, Mammalian Development Laboratory, National Institute of Genetics, Mishima, 411-8540, Japan

3. Department of Genetics, The Graduate University for Advanced Studies, SOKENDAI, Mishima, 411-8540, Japan

4. Advanced Genomics Center, National Institute of Genetics, Mishima, 411-8540, Japan

23 **Abstract**

24 The evolutionarily conserved RNA helicase DDX6 is a central player of post-transcriptional  
25 regulation, but its role during embryogenesis remains elusive. We here demonstrated that DDX6  
26 enables proper cell lineage specification from pluripotent cells by analyzing *Ddx6* KO mouse  
27 embryos and *in vitro* epiblast-like cell (EpiLC) induction system. Our study unveiled a great  
28 impact of DDX6-mediated RNA regulation on signaling pathways. Deletion of *Ddx6* caused the  
29 aberrant transcriptional upregulation of the negative regulators of BMP signaling, which  
30 accompanied with enhanced Nodal signaling. *Ddx6*<sup>Δ/Δ</sup> pluripotent cells acquired higher  
31 pluripotency with a strong inclination toward neural lineage commitment. During gastrulation,  
32 abnormally expanded *Nodal* expression in the primitive streak likely promoted endoderm cell  
33 fate specification while inhibiting mesoderm development. We further clarified the mechanism  
34 how DDX6 regulates cell fate determination of pluripotent cells by genetically dissecting major  
35 DDX6 pathways: processing body (P-body) formation, translational repression, mRNA decay,  
36 and miRNA-mediated silencing. P-body-related functions were dispensable, but the miRNA  
37 pathway was essential for the DDX6 function. DDX6 may prevent aberrant transcriptional  
38 upregulation of the negative regulators of BMP signaling by repressing translation of certain  
39 transcription factors through the interaction with miRNA-induced silencing complexes  
40 (miRISCs). Overall, this delineates how DDX6 affects development of the three primary germ  
41 layers during early mouse embryogenesis and the underlying mechanism of DDX6 function.

42

43

44

45

46 **Author summary**

47 Gene expression occurs through the two steps: transcription (DNA to RNA) and translation  
48 (RNA to protein). Cells have very sophisticated regulatory processes working on various levels  
49 for the accurate gene expression. Post-transcriptional regulation, which includes all RNA-related  
50 controls, is crucial because it enables fine-tuning and rapid alteration of gene expression. RNA-  
51 binding proteins and non-coding RNAs are the two main players of post-transcriptional  
52 regulation. DDX6, the subject of our study, is an RNA-binding protein, more specifically an  
53 RNA helicase, which can unwind or rearrange RNA secondary structures. Its diverse molecular  
54 and cellular functions have been reported, but its embryogenic role is unknown. Here, we  
55 describe DDX6 function during early mouse embryogenesis and the underlying mechanism  
56 using genetic methodology. DDX6 enables proper cell lineage specification of pluripotent stem  
57 cells by mainly regulating BMP signaling through miRNA-mediated gene silencing. As DDX6-  
58 mediated RNA regulation affected signaling pathways, the loss of *Ddx6* had a wide impact on  
59 developmental processes from pluripotency to embryo patterning. In addition, we identified  
60 which DDX6 molecular function is essential during early embryogenesis by genetically  
61 dissecting its main pathways.

62

63

64

65

66

67

68

## 69 **Introduction**

70           Post-transcriptional regulation, located in the middle layer of gene expression, is a critical  
71 controlling point where many mRNA regulatory processes occur. RNA-binding proteins (RBPs)  
72 and non-coding RNAs are the two main players (Kaikkonen et al., 2011; Dassi, 2017). Among  
73 diverse RBPs, RNA helicases are characterized by their wide range of involvement in RNA  
74 metabolism by binding RNA or remodeling ribonucleoprotein complexes (RNPs) (Tanner &  
75 Linder, 2001; Jankowsky, 2011). DEAD box proteins compose the largest RNA helicase family  
76 sharing the Asp-Glu-Ala-Asp (DEAD) motif and having ATP-dependent RNA unwinding  
77 activity (Linder & Jankowsky, 2011). Mice have 43 DEAD box RNA helicases. Among them,  
78 we focused on DDX6, an evolutionarily conserved throughout eukaryotes (Weston &  
79 Sommerville, 2006). DDX6 participates in many aspects of RNA metabolism: processing body  
80 (P-body) formation (Serman et al., 2007; Minshall et al., 2009), stress granule assembly, mRNA  
81 storage, mRNA decay (Coller et al., 2001), translational repression (Coller & Parker, 2005;  
82 Kamenska et al., 2016), microRNA (miRNA) pathway (Chu and Rana et al., 2006; Eulalio et al.,  
83 2007), and translational promotion (Scheller et al., 2009; Wang et al., 2015). Many molecular  
84 and cellular studies on DDX6 have been reported, but investigation of its embryonic  
85 developmental function is limited.

86           Gastrulation is a milestone in embryogenesis because the primary germ layers that give  
87 rise to all cell types develop during this developmental event. The three germ layers of the  
88 embryo, the ectoderm, mesoderm, and endoderm, basically originate from the inner cell mass  
89 (ICM) of the blastocyst. Pluripotent embryonic stem cells (ESCs) can be derived from the ICM  
90 of E3.5 early blastocysts or the epiblast of E4.5 late blastocysts (Evans & Kaufman, 1981;  
91 Thomson et al., 1995; Brook & Gardner, 1997; Thomson et al., 1998). Cells at these stages are in

92 the naive (ground) pluripotent state. Soon after implantation, naive epiblasts differentiate into the  
93 primed pluripotent state in which cells become capable of committing to a certain lineage during  
94 gastrulation (Nichols & Smith, 2009; Smith, 2017; Mulas et al., 2017). The recently developed *in*  
95 *vitro* model, epiblast-like cells (EpiLCs) permit more precise staging of mouse pluripotent cells.  
96 Transcriptomic analysis demonstrated that EpiLCs, induced from ESCs, have similar properties  
97 to the epiblast of post-implanted, pre-gastrulating (E5.5~6.0) embryos (Hayashi et al., 2011).  
98 These *in vitro* systems enable detailed examination of pre- and early post-implantation embryos  
99 which are normally difficult to investigate *in vivo* due to their small size.

100 From the 8-cell stage, transcription factors and signaling pathways play a major role in  
101 cell fate determination (Rossant, 2018). The transforming growth factor- $\beta$  (TGF- $\beta$ ) superfamily  
102 is one of major signaling pathways involved in early mammalian development. Bone  
103 morphogenetic protein (BMP) and Nodal belong to a different subgroup and they utilize  
104 distinctive serine/threonine kinase receptors for signal transduction. Activated receptors  
105 phosphorylate downstream intracellular mediators, receptor SMADs 1, 5 and 8 for BMP  
106 signaling, and SMADs 2 and 3 for Nodal signaling (Liu et al., 1996; Massague, 1996). BMP and  
107 Nodal signaling are known to mutually antagonize each other, and this antagonism mainly occurs  
108 intracellularly through the competition for the common signal mediator SMAD4 (Candia et al.,  
109 1997; Furtado et al., 2008; Katsu et al., 2013; Soh et al., 2020). BMP signaling has multiple roles  
110 during early post-implantation development. It is required for extra-embryonic mesoderm  
111 formation (Zhang & Bradley, 1996), primordial germ cell (PGC) induction (Lawson et al., 1999),  
112 mesoderm development and patterning (Winnier et al., 1995), and inhibiting premature neural  
113 differentiation (Di-Gregorio et al., 2007). BMP signaling is dispensable for ESC self-renewal,  
114 but required for proper differentiation (Fei et al., 2010; Morikawa et al., 2016). Nodal pathway

115 exerts its influence when ESCs undergo transition from the naive pluripotency. Nodal is  
116 important for securing primed pluripotency with the capacity to differentiate into multi-lineages  
117 (Mulas et al., 2017).

118         There are two previous studies that assessed the role of DDX6 in mouse and human  
119 pluripotent cells. In mESCs, DDX6 is necessary for translational repression of miRNA targets  
120 and *Ddx6* knockout (KO) cells exhibited similar phenotypes to *Dgcr8* KO ESCs, which lack all  
121 miRNAs (Freimer et al., 2018). Another study elucidated the relationship between stem cell  
122 potency and P-body-mediated translational regulation. As an essential factor of P-body  
123 formation, once DDX6 was depleted, P-bodies were disassembled then translationally  
124 suppressed target mRNAs, including many transcription factors and chromatin regulators, re-  
125 entered the translation pool. The resultant increased expression of target genes altered chromatin  
126 organization, and made both human and mouse primed ESCs become more naively pluripotent  
127 by being resistant to differentiation (Di Stefano et al., 2019).

128         However, these examinations were conducted on ESCs or very early differentiation  
129 stages. To deepen our understanding of the role of DDX6 as a key post-transcriptional regulator  
130 during early mouse embryogenesis, we examined *Ddx6* KO embryos. Gastrulation stages were  
131 investigated in embryos and the earlier time points were assessed using an ESC-to-EpiLC  
132 induction model. This study revealed that DDX6 exerts potent effects on the development of the  
133 three primary germ layers by preventing aberrant inhibition of the BMP signaling pathway.  
134 Furthermore, through genetic dissection of the DDX6 pathways, we found that DDX6 works  
135 through the miRNA pathway, while P-bodies are dispensable during early development.

136

137

138 **Results**

139 ***Ddx6* knockout results in embryonic lethality with severe morphological defects**

140 Before investigating the functions of DDX6 during embryogenesis, we examined its  
141 expression pattern through DDX6 immunohistochemistry (IHC). In embryonic day (E) 6.5  
142 embryos, DDX6 was highly and ubiquitously expressed as forming cytoplasmic foci (Fig. S1A).  
143 All DDX6 foci co-localized with DCP1A foci, a P-body specific marker, indicating that DDX6 is  
144 expressed in P-bodies. At E7.5, DDX6 expression was strongest in the epiblast and there were  
145 many clear P-body foci (Fig. S1B). BRACHYURY-positive emerging and migrating mesoderm  
146 cells had relatively weaker DDX6 expression and a fewer number of P-bodies. In E8.5 embryos,  
147 DDX6 expression was observed in all areas including the neuroepithelium, the tailbud, and  
148 somites (Fig. S1C). DDX6 is ubiquitously expressed in early embryos in P-bodies.

149 To clarify the role of DDX6 in embryonic development, we generated a *Ddx6*<sup>Δ/+</sup> mouse  
150 line and crossed heterozygous mice to get *Ddx6*<sup>Δ/Δ</sup> (KO) embryos. All *Ddx6*<sup>Δ/Δ</sup> embryos died by  
151 E11.5 (Table 1), and developmental defects were already observed from E6.5 (Fig. 1A). At E7.5,  
152 mutants were smaller, but an extraembryonic body part was developed and embryos formed a  
153 cylindrical shape. Morphological defects became prominent from E8.5, and more phenotypical  
154 variances appeared (Fig. S2A). E8.5 *Ddx6* KO embryos were categorized into three groups  
155 according to the severity of posterior body defects (Fig. 1A). Type I mutants developed clear  
156 head folds with a short posterior body part. Type II embryos had a head fold structure but mid-  
157 posterior body development was more disrupted than Type I. Type III were tiny and were unable  
158 to fully escape the egg cylinder shape. The frequency of each mutant was estimated as Type III  
159 (~60%), Type II (~30%), and Type I (~10%). From E9.5, *Ddx6*<sup>Δ/Δ</sup> embryos were divided into

160 two groups: one that developed some mid-posterior body and another with marked posterior  
161 truncation (Fig. S2B). Therefore, DDX6 is necessary for mouse embryonic development.

162

163 **Transcriptomic analyses revealed negative regulation of BMP signaling in *Ddx6*<sup>Δ/Δ</sup>**  
164 **embryos**

165 To find possible causes of defects, we performed RNA sequencing (RNA-seq). Two E8.5  
166 *Ddx6* KO cDNA libraries were generated. Being consistent with morphological phenotypes,  
167 gene ontology (GO) term enrichment analysis indicated that genes of major developmental  
168 processes, especially the formation of mesoderm derivatives, were downregulated in *Ddx6* KO  
169 libraries (Fig. 1B). In contrast, the terms associated with cell death, immune response, cell  
170 metabolism, and negative regulation of BMP signaling pathway-related genes were highly  
171 upregulated. Negative regulation of the BMP signaling pathway was notable, because BMP  
172 signaling has multiple important roles during early embryogenesis. Various kinds of BMP  
173 negative regulators were upregulated in *Ddx6*<sup>Δ/Δ</sup> embryos (Fig. 1C). Based on the reported  
174 functions, genes that are listed as the negative regulators of BMP signaling were classified into  
175 five clusters: receptor-related (*Inhbb*, and *Tmprss6*), secreted BMP antagonists (*Cer1*, *Chrd*,  
176 *Chrdl2*, *Noggin*, *Grem2*, and *Htra1*), TGF-β signaling-related (*Lgals9*, *Xdh*, *Pail*, *Hpgd*, and  
177 *miR-382*), FGF signaling-related (*Fgf5*), and intracellular inhibitor (*Nanog*) (Fig. 1D). As the  
178 genes that are related to the inhibition of BMP signaling were highly upregulated, we examined  
179 whether BMP signaling is repressed in *Ddx6*<sup>Δ/Δ</sup> embryos. We reasoned that if BMP signal  
180 transduction is indeed dysfunctional, then *Ddx6*<sup>Δ/Δ</sup> embryos would exhibit the representative  
181 phenotypes of BMP signaling mutant embryos.

182



## 183 ***Ddx6*<sup>Δ/Δ</sup> embryos display phenotypes arising from the disrupted BMP signaling pathway**

### 184 **1) Mesoderm formation defects**

185 BMP signaling is required for mesoderm formation and posterior body development  
186 (Winnier et al., 1995; Reversade et al., 2005). Whole-mount *in situ* hybridization (WISH) with  
187 *Otx2* probe, which marks a head region, indicated the lack of posterior body in Type III mutants  
188 (Fig. 2A). We analyzed mesodermal defects using E8.5 embryo RNA-seq data. Two KO samples  
189 showed difference in mesoderm-related gene expression (Fig. 2B-C). This difference was  
190 consistent with the types of mutants that compose each library. KO1, constituted with one Type  
191 II and one Type III mutant, had similar expression pattern to WT. In contrast, KO2, constituted  
192 with three Type III mutants, had a very different transcriptome, in which the expression of early  
193 mesoderm marker genes was higher, but that of differentiating mesoderm was significantly  
194 downregulated. Visualization of *Brachyury* (*T*) expression via WISH revealed that the primitive  
195 streak formed in all types of E8.5 *Ddx6*<sup>Δ/Δ</sup>, but somites were barely developed (Fig. 2D).  
196 Gastrulation begins ~E6.5 as the primitive streak forms and is preceded by *Brachyury* expression  
197 (Snell and Stevens, 1966; Rivera-Perez and Magnuson, 2005). Unlike WT, *Ddx6*<sup>Δ/Δ</sup> embryos  
198 started expressing BRACHYURY (T) from E7.5 (Fig. 2E). Therefore, there is a delay of  
199 primitive streak formation in *Ddx6*<sup>Δ/Δ</sup> embryos, and their shortened and widened primitive streak  
200 suggests that the nascent mesoderm population has defects in differentiation and subsequent  
201 ingression.

202 An evidence of suppressed BMP signaling in *Ddx6*<sup>Δ/Δ</sup> embryos was increased Nodal  
203 signaling. BMP and Nodal signaling are often in a competitive relationship, and they can  
204 suppress each other. During gastrulation, a gradient of NODAL activity patterns the primitive  
205 streak and allocates mesoderm progenitors. NODAL and its downstream target EOMES

206 together define the anterior primitive streak (APS), from which cardiac mesoderm and definitive  
207 endoderm progenitors are specified (Brennan et al., 2001; Arnold et al., 2008; Teo et al., 2011;  
208 Costello et al., 2011). WISH showed that *Nodal* expression was confined to the node in E7.5 WT  
209 embryos, but its expression was highly spread over the proximal-posterior region in *Ddx6*<sup>Δ/Δ</sup>  
210 embryos (Fig. 2F). The expression was eventually restricted to the node by E8.5, but the  
211 expression level remained high. *Eomes* is highly expressed in the extraembryonic ectoderm and  
212 the posterior part of the epiblast at E6.5. Its expression moves distally to the primitive streak at  
213 E7.5 (Russ et al., 2000), and is reduced by E8.5 in the WT embryos. However, E8.5 *Ddx6*<sup>Δ/Δ</sup>  
214 embryos retained high-level expression (Fig. 2G). There were two types of knockout embryos at  
215 E7.5, which could reflect the difference in severity of mutant phenotypes. One type had a slightly  
216 stronger expression level of *Eomes*, but the positive area was similar to E6.5 WT. The other had  
217 strong expression encompassing nearly the entire body (Fig. 2G). RNA-seq analyses showed that  
218 the KO2 sample had downregulated expression of differentiated mesoderm genes, while the  
219 expression of endoderm lineage genes was upregulated. KO2 exhibited higher expression of  
220 mesendoderm progenitor markers (*Mixl1*, and *Gsc*), endoderm progenitor marker (*Lhx1*), and  
221 definitive endoderm markers (*Sox17*, and *Foxa2*) (Fig. 2B-C). The ‘Endoderm cell fate  
222 specification’ category was also enriched in GO term analysis of most upregulated genes in  
223 *Ddx6*<sup>Δ/Δ</sup> (Fig. 1B). Therefore, posteriorly expanded high expression of the APS marker *Nodal*  
224 and *Eomes* disturbed the patterning of the primitive streak, which likely directed mesendoderm  
225 progenitors toward the endodermal lineage. Transcript levels of some key genes were further  
226 assessed by RT-qPCR using separately prepared Type III mutant embryos and the results were  
227 consistent with the RNA-seq data (Fig. S2C). Altogether, *Ddx6*<sup>Δ/Δ</sup> embryos have defects in

228 posterior body development and mesoderm differentiation like as BMP signaling mutant  
229 embryos.

230

## 231 **2) Premature neural induction**

232 BMP signaling also prevents the premature neural induction (Di-Gregorio et al., 2007).

233 We examined whether this function was also impaired in *Ddx6*<sup>Δ/Δ</sup> embryos. SOX1 is the earliest  
234 neuroectoderm marker, and it is normally not detected until E7.5 in WT embryos (Wood &  
235 Episkopou, 1999; Di-Gregorio et al., 2007). However, E6.5 *Ddx6*<sup>Δ/Δ</sup> embryos exhibited clear  
236 SOX1 expression in all epiblast cells (Fig. 3A). Additionally, RNA-seq found premature  
237 neuronal differentiation in *Ddx6*<sup>Δ/Δ</sup>. The markers of neural stem cells (NSCs) and neural  
238 progenitor cells (NPCs), such as *Sox1* and *Pax6*, were downregulated, but genes of neuron-  
239 restricted progenitors and differentiated post-mitotic neuronal cells were upregulated (Fig. 3B-  
240 C). Section IHC confirmed that protein expression was similar to transcript levels. The earliest  
241 neuroectoderm marker, SOX1, and a persistent marker of NSC and NPC, SOX2 (Ellis et al.,  
242 2004), were weakly expressed in E8.5 *Ddx6*<sup>Δ/Δ</sup> embryos (Fig. 4D). DCX is a marker of neuronal  
243 precursors or early immature neurons, and is expressed in migrating neurons. The uppermost part  
244 of the cortical plate, which is composed of the most recently migrated neurons, also exhibits  
245 strong DCX immunoreactivity (Gleeson et al., 1999). In KO embryos, the intensity of DCX  
246 signal was stronger throughout the body. A strong DCX-positive layer was also observed  
247 (marked by a yellow arrow) (Fig. 3E). In summary, in *Ddx6*<sup>Δ/Δ</sup> embryos, the neural lineage was  
248 precociously induced like in BMP receptor mutant embryos (Di-Gregorio et al., 2007).  
249 Moreover, *Ddx6*-deficient NSCs showed defects in maintaining self-renewal and prematurely  
250 differentiated.

251

252 **Posterior epiblast of *Ddx6*<sup>Δ/Δ</sup> embryos cannot exit the pluripotency on time**

253 As described earlier, Nodal signaling, in an antagonistic relationship with BMP signaling,  
254 gets upregulated when BMP signaling is suppressed. One example was the increased expressions  
255 of *Nodal* and its downstream target *Eomes* in the primitive streak of E8.5 *Ddx6*<sup>Δ/Δ</sup> embryos (Fig.  
256 2F-G). Nodal signaling is also important for regulating primed pluripotency. Activin/Nodal  
257 signaling is required to induce *Nanog* transcription in mEpiSCs (Vallier et al., 2009). Therefore,  
258 we examined whether the expression of this another Nodal signaling target gene was also  
259 increased in *Ddx6*<sup>Δ/Δ</sup> embryos. The core pluripotency factors *Nanog* and *Pou5f1* (*Oct4*) and a  
260 naive pluripotency marker, *Klf4*, were upregulated in *Ddx6*<sup>Δ/Δ</sup> (Fig. 4A). However, the  
261 expression of another naive ground state marker, *Esrrb*, was similar to WT, and *Rex1* expression  
262 was higher only in the KO2. The partially retained expression of the naive pluripotency-specific  
263 genes in E8.5 embryos suggested that exit from the ground pluripotent state did not occur  
264 properly in *Ddx6* mutants. We examined the NANOG expression by section IHC (Fig. 4B). In  
265 WT embryos, NANOG expression was strongest in the primitive streak at E6.5, but at E7.5, its  
266 expression moved anteriorly and the posterior part was negative. Contrarily, E7.5 *Ddx6*<sup>Δ/Δ</sup>  
267 embryos exhibited strong NANOG expression in the posterior epiblast. Ectopic and high  
268 expression of NANOG in the posterior part was maintained until E8.5 when its expression was  
269 not detected in the whole body of E8.5 WT embryos. Enriched GO terms among downregulated  
270 genes from RNA-seq, ‘Cell fate commitment’ and ‘Cell fate determination’ supported the  
271 strengthened primed pluripotency and the retained naive pluripotency of *Ddx6*<sup>Δ/Δ</sup> embryos.

272

273 ***Ddx6*<sup>Δ/Δ</sup> pluripotent cells also show repressed BMP signaling with enhanced Nodal**  
274 **signaling**

275 We have examined E8.5 *Ddx6*<sup>Δ/Δ</sup> embryos and considered repressed BMP signaling as a  
276 major cause of their developmental defects. We then looked for the earliest time point when  
277 inhibition of BMP signaling occurs in *Ddx6*<sup>Δ/Δ</sup>. There were no morphological abnormalities until  
278 E3.5 blastocysts and ESCs were successfully established from them. DDX6 was highly  
279 expressed in ESCs and EpiLCs in P-bodies, which were disassembled in *Ddx6*<sup>Δ/Δ</sup> cells (Fig.  
280 S3A-B). The proliferation rate of *Ddx6*<sup>Δ/Δ</sup> ESCs was lower (Fig. 5A), but they had no defects in  
281 maintaining pluripotency over many passages. Rather, like E8.5 *Ddx6*<sup>Δ/Δ</sup> embryos, they  
282 expressed higher levels of pluripotency genes, such as *Oct4*, *Nanog*, *Sox2*, *Klf4*, and *Rex1*, than  
283 WT ESCs (Fig. 5B).

284 Since *Ddx6*<sup>Δ/Δ</sup> blastocysts and ESCs did not exhibit notable abnormalities, we examined  
285 their next developmental capacity. We conducted ESC-to-EpiLC induction to mimic the natural  
286 *in vivo* development. The transition of the naive ground state ESCs to primed pluripotent state  
287 EpiLCs takes two days and EpiLC Day1 is regarded as a transition state that exhibits a  
288 distinctive open chromatin landscape and transcriptome (Yang et al., 2019). During EpiLC  
289 induction, the difference in cell number between WT and *Ddx6*<sup>Δ/Δ</sup> cells markedly increased (Fig.  
290 5C). We then investigated the expression pattern of several key genes during EpiLC induction by  
291 RT-qPCR. Firstly, we checked well-known EpiLC markers *Fgf5* and *Nodal*, and an important  
292 regulator of the transition state, ZIC3, which exhibits peak expression on EpiLC Day1 (Yang et  
293 al., 2019). *Ddx6*<sup>Δ/Δ</sup> cells had significantly higher expression of *Nodal* and *Zic3*, but there was no  
294 difference in *Fgf5* expression (Fig. 5D). After confirming successful induction, we examined the  
295 expression profile of pluripotency and early differentiation-related genes. As shown in Fig. 5B,

296 *Ddx6*<sup>Δ/Δ</sup> ESCs exhibited slightly higher expression of pluripotency genes and this difference  
297 increased during EpiLC induction (Fig. 5E). They had much higher expression of naive  
298 pluripotency markers (*Klf4*, *Rex1*), suggesting that even though an overall transition was made to  
299 the EpiLC state, cells failed to completely exit from the ground state. We also noted a change in  
300 differentiation capacity of *Ddx6*<sup>Δ/Δ</sup> cells. Neural lineage-inducing genes, such as *Sox1*, *Sox2*, and  
301 *Pax6*, were highly upregulated in *Ddx6*<sup>Δ/Δ</sup> cells, whereas the mesendoderm lineage inducer *T*  
302 was significantly downregulated (Fig. 5F). We also conducted a monolayer differentiation  
303 experiment. ESCs favor neuronal differentiation in low-density, serum-free, and feeder-free  
304 culture conditions (Tropepe et al, 2001). Compared with WT ESCs, *Ddx6*<sup>Δ/Δ</sup> ESCs differentiated  
305 and developed into neurons quickly. *Ddx6*<sup>Δ/Δ</sup> cells exhibited stronger expression of TuJ1 with  
306 the morphology of well-developed dendrites and axons on differentiation Day1 (Fig. 5G). This  
307 observation was similar to premature neural differentiation noted in E8.5 *Ddx6*<sup>Δ/Δ</sup> embryos.  
308 Taken together, *Ddx6*<sup>Δ/Δ</sup> embryos developed normally until the blastocyst stage and ESCs had  
309 no defects in self-renewal. However, the differentiation capacity of *Ddx6*<sup>Δ/Δ</sup> pluripotent cells  
310 was strongly skewed to neuronal lineage commitment.

311 BMP signaling is important to prevent differentiation of ESCs to the neuronal lineage  
312 (Ying et al., 2003). Thus, strong inclination of *Ddx6*<sup>Δ/Δ</sup> ESCs toward the neuronal cell fate  
313 would suggest that this brake is nonfunctional. We investigated whether SMAD-dependent BMP  
314 signaling pathway was repressed in *Ddx6*<sup>Δ/Δ</sup> cells. In ESCs and the initial differentiation stage,  
315 BMP signaling has a transcriptional repressive role on these SMAD1/5 target genes (Fei et al.,  
316 2010). We examined expression pattern of known SMAD1/5 target genes in ESCs and found that  
317 the expression of *Accn4*, *Alx3*, *Dpysl2*, and *Kdm6b* was higher in *Ddx6*<sup>Δ/Δ</sup> cells (Fig. 5H). These  
318 suggest that target genes were transcriptionally de-repressed due to reduced BMP signaling. In

319 particular, *Dpsyl2* and the H3K27 demethylase *Kdm6b* are early neural differentiation regulators  
320 (Burgold et al., 2008; Fei et al., 2010); therefore, their high expressions are consistent with the  
321 phenotype of *Ddx6*<sup>Δ/Δ</sup> ESCs preferring neural lineage commitment. We then asked whether  
322 aberrant transcriptional activation of a set of BMP signaling inhibitors also occurred in *Ddx6*<sup>Δ/Δ</sup>  
323 pluripotent cells. Like *Ddx6*<sup>Δ/Δ</sup> embryos, *Ddx6*<sup>Δ/Δ</sup> ESCs exhibited a significant increase in  
324 expressions of negative regulators of the BMP pathway during EpiLC induction (Fig. 5I). Along  
325 with suppressed BMP signaling, *Ddx6*<sup>Δ/Δ</sup> ESCs also displayed the features of enhanced Nodal  
326 signaling by having high expression level of *Nodal* and *Nanog* (Fig. 5D,E). These indicate that  
327 inhibition of BMP signaling and increase of Nodal signaling are the cell-intrinsic changes  
328 occurring when DDX6 is absent.

329

### 330 **Depletion of DDX6 quickly induce transcriptional upregulation of *Nodal* and the negative** 331 **regulators of BMP signaling**

332 To further confirm that the aberrant activation of BMP signaling inhibition is a cell-  
333 intrinsic property of *Ddx6*<sup>Δ/Δ</sup> cells, we conditionally deleted *Ddx6* using the *Rosa-CreER*<sup>T2</sup>;  
334 *Ddx6*<sup>flx/flx</sup> mouse line. As we expected that loss of DDX6 to cause mesoderm formation defects,  
335 we removed DDX6 during gastrulation. Firstly, we examined the time required for complete  
336 depletion of DDX6. When tamoxifen was administered to the pregnant female via oral gavage at  
337 E6.5, *Ddx6* deletion and depletion of existing DDX6 proteins were completed by E7.5 (Fig. 6A).  
338 We then injected tamoxifen at E6.5 and collected embryos at E8.5 to examine their phenotypes.  
339 Conditional knockout (cKO) embryos of the same litter exhibited variable phenotypes like  
340 conventional knockout embryos (Fig. 6B). A few had marked posterior truncation (KO2, KO17).  
341 The others developed the mid-to-posterior body part, but it was shorter and smaller, and the head

342 and heart morphology was abnormal (KO7, KO12). Although the phenotypes were milder than  
343 those of conventional KO embryos, conditional KO embryos also demonstrated characteristic  
344 gene expression of *Ddx6* mutants. The expression of the negative regulators of BMP (*Chrd*,  
345 *Noggin*, *Lgals9*, *Xdh*, *Pai*), *Nodal*, and *Eomes* increased after the depletion of DDX6 (Fig. 6C).  
346 Therefore, this conditional KO experiment reconfirmed that DDX6 is essential during  
347 gastrulation and that the loss of *Ddx6* makes cells activate inhibitory regulation of BMP  
348 signaling.

349

350 **Genetic dissection of the DDX6-mediated RNA regulatory pathways: DDX6 mainly works**  
351 **through the miRNA pathway during early embryogenesis**

352 Next, we aimed to identify which DDX6 pathway is most crucial during early  
353 development. DDX6 functions as a hub of post-transcriptional regulation. Due to its wide range  
354 of involvement, it is difficult to pinpoint which pathway is responsible when DDX6 is depleted.  
355 Therefore, we individually disrupted three main DDX6-mediated pathways by knocking out a  
356 key gene of each pathway (Fig. 7A). Translational repression along with P-body formation was  
357 impaired in *Eif4enif1* KO, 5'-to-3' mRNA degradation was impaired in *Dcp2* KO, and miRNA-  
358 mediated gene silencing was disrupted in *Dgcr8* KO (Andrei et al., 2005; Ferraiuolo et al., 2005;  
359 Wang et al., 2007; Aizer & Kalo, 2014; Ayache et al., 2015).

360 To see the effects on the transcriptomic landscape over the time course of development,  
361 we generated cDNA libraries of ESC and EpiLC Day2 stage from all mutant groups and WT.  
362 PCA analysis demonstrated that *Ddx6* KO is greatly different from WT, *Eif4enif1* KO, and *Dcp2*  
363 KO, while it is very similar to *Dgcr8* KO (Fig. 7B). Moreover, *Dgcr8* KO embryos in a later  
364 developmental stage also showed very similar morphological defects to *Ddx6* KO embryos (Fig.



365 7C). *Eif4enif1* KO and *Dcp2* KO, whose protein functions directly affect P-body metabolism,  
366 resulted in similar transcriptomes. *Eif4enif1* KO, in which translational repression on transcripts  
367 is disrupted, resulted in disassembly of P-bodies, while *Dcp2* KO caused enlargement of P-  
368 bodies due to blockage of mRNA degradation (Fig. S4A). Even though their transcriptomes were  
369 different from WT, gastrulation occurred quite normally in KO embryos except subtle defects  
370 (Fig. S4B-C). E9.5 *Eif4enif1* KO embryos were smaller than the littermate control, and E9.5  
371 *Dcp2* KO embryos exhibited smaller posterior body structure. Based on these data, we conclude  
372 that P-bodies are dispensable at least until the peri-gastrulation stage. Changes on P-body  
373 metabolism affected the transcriptome of cells, but the changes in gene expression were not  
374 substantial to alter the differentiation capacity of pluripotent stem cells.

375         Because of similar transcriptomic changes in cells and embryo phenotypes between *Ddx6*  
376 KO and *Dgcr8* KO, we conducted detailed analyses during ESC-to-EpiLC differentiation  
377 through RT-qPCR. *Dgcr8* KO cells exhibited very similar characteristics to *Ddx6* KO pluripotent  
378 cells: enhanced pluripotency and the stronger expression of the neural lineage-inducing factors  
379 with a decreased differentiation capacity to the mesendoderm lineage (Fig. 7D). As we have  
380 identified that repression of BMP signaling is the primary change of cellular condition in *Ddx6*  
381 KO, we checked if it also happens in *Dgcr8* KO. *Dgcr8* KO cells had upregulated expression of  
382 the negative regulators of BMP signaling and de-repression of pSMAD1/5 target genes.  
383 Although GO term enrichment analysis of pluripotent cells RNA-seq did not hit ‘negative  
384 regulation of BMP signaling’ (Fig. S4D), a more sensitive gene set enrichment analysis (GSEA)  
385 detected this gene set. The ‘negative regulation of BMP signaling’ gene set was highly  
386 upregulated only in *Ddx6* KO and *Dgcr8* KO ESCs, but not in *Eif4enif1* and *Dcp2* KO ESCs  
387 (Fig. 7E, S4E). These indicate that DDX6-mediated RNA regulation and miRNA-mediated gene

388 silencing share the common role, especially preventing aberrant transcriptional activation of the  
389 negative regulators of BMP signaling.

390 We next searched the underlying mechanism for increased transcript level of BMP  
391 inhibitors in *Ddx6* KO and *Dgcr8* KO. As DDX6 is suggested to participate in translational  
392 repression process mediated by a miRNA-induced silencing complex (miRISC) (Freimer et al.,  
393 2018), transcriptional upregulation of the negative regulators of BMP signaling would be the  
394 secondary effect. We hypothesized that translation of certain transcript factors is increased in the  
395 absence of translational repressive regulation by DDX6 and miRNAs, and eventually  
396 transcription of their target genes gets upregulated. To check this idea, we searched transcription  
397 factors that bind to the BMP negative regulators using ChIP-Atlas database (Oki & Ohta, 2015),  
398 and found some common proteins (Fig. 7F). Changes in translation were assessed by examining  
399 published *Ddx6* KO and *Dgcr8* KO ESC polysome profiling data (Freimer et al., 2018), and the  
400 number of transcripts with high polysome (+4 ribosomes), which are being translated, was  
401 increased in both KOs (Fig. 7G). Of note, most of them regulate *Nanog* transcription, and *Fgf5*,  
402 *Pail*, *Chrd*, *Nog*, *Cer1*, *Grem2* are also frequently targeted by these transcription factors.  
403 Therefore, this result supports our reasoning of the underlying mechanism that causes  
404 transcriptional upregulation of the negative regulators of BMP signaling in the absence of DDX6  
405 and the miRNA-mediated gene regulation.

406

## 407 **Discussion**

408 This study delineated an essential role of DDX6 in proper cell lineage specification and  
409 differentiation in early mouse embryogenesis (Fig. 8A-B). We found that DDX6 prevents cells  
410 from activating negative regulation of BMP signaling through the miRNA-mediated gene

411 silencing. The genes that are related to ‘negative regulation of BMP signaling’ were upregulated  
412 in both *Ddx6* KO E8.5 embryos and ESCs. Their phenotypes including posterior body and  
413 mesoderm development defect, premature neural induction, and de-repression of BMP-  
414 SMAD1/5 target genes indicate that the BMP pathway is nonfunctional in *Ddx6* KO. Another  
415 characteristics of *Ddx6* KO was enhanced Nodal signaling, in an antagonistic relationship with  
416 BMP signaling. Promoted pluripotency, such as increased *Nanog* expression, can be attributable  
417 to high *Nodal* expression.

418         Single cell multi-omics analysis of peri-gastrulating mouse embryos revealed that  
419 enhancers of the ectoderm lineage are active in the epiblast of E4.5 embryos (Argelaguet et al.,  
420 2019), but the mechanism that enables ectoderm specification to occur at the same time as the  
421 mesoderm and endoderm develop during gastrulation remains unclear. Genome-wide mapping of  
422 SMAD1/5 targets revealed that BMP-SMAD pathway mainly represses transcription in mESCs  
423 (Fei et al., 2010). SMAD1/5 binds to the promoter of a set of developmental regulators whose  
424 expression affects cell fate determination. Among them, those related to nervous system  
425 development were most significantly enriched. Taken together with our observations of *Ddx6*  
426 KO, in which BMP signaling is repressed, transcriptional repression by the BMP-SMAD1/5  
427 pathway may be the main mechanism that prevents precocious activation of neuroectoderm (NE)  
428 genes in the open chromatin state and allows simultaneous development of the three germ layers.  
429 We also contemplated about the relationship between pluripotency and neural lineage. Of note,  
430 the deletion of *Ddx6* promoted both pluripotency and inclination to neural lineage commitment.  
431 This serves as further evidence that the pluripotent state and cell-fate decision to neuroectoderm  
432 are somehow managed together. In addition, we found that the well-known NE or neuronal  
433 marker TuJ1 (TUBB3) is expressed in the primed pluripotent epiblast (Fig. S5A). This suggests

434 the closeness of pluripotent cells and neuroectoderm-committed cells. Further understanding of  
435 this property will be useful for stem cell and neurodevelopmental biology research.

436 As embryos have abundant P-bodies from blastocyst to peri-gastrula embryos, the  
437 marginal effect of disrupted P-body metabolism on early embryogenesis was unexpected. Di  
438 Stefano et al. (2019), stated that disruption of P-bodies is the reason of *Ddx6*-deficient ESCs  
439 being “hyper-pluripotent,” but we refute this idea based on our results. Deletion of *Eif4enif1*, one  
440 of the core P-body component, led to disassembly of P-bodies in ESCs, but *Eif4enif1* KO  
441 pluripotent cells did not display “hyper-pluripotent” property unlike *Ddx6* KO cells, and  
442 *Eif4enif1* KO embryos did not show developmental defects that *Ddx6* mutants displayed.  
443 Therefore, P-bodies are not essential for development at least until the gastrulation stage. Di  
444 Stefano et al., knocked out *Lsm14a*, another core P-body component and a translational  
445 repressor, to examine whether *Ddx6* KO phenotype was P-body-dependent. Thus, it is possible  
446 that some specific functions of the DDX6-LSm14A complex are important rather than formation  
447 of P-bodies.

448 Our transcriptomic analyses identified the similarity between *Ddx6* KO and *Dgcr8* KO,  
449 but not with *Eif4enif1* KO or *Dcp2* KO. Only *Dgcr8* KO closely phenocopied *Ddx6* KO,  
450 indicating that DDX6 mainly works through the miRNA pathway among its various regulatory  
451 means during early embryogenesis. In *Dgcr8* KO, the miRNA-mediated gene silencing becomes  
452 nonfunctional because of failure of generating miRNAs (Wang et al., 2007). DDX6 participates  
453 in the effector step of miRNA-mediated gene silencing (Chen et al., 2014). Freimer et al. (2018),  
454 showed that loss of DDX6 only impairs miRNA-induced translational repression but not mRNA  
455 destabilization in mESCs. Thus, we have analyzed translation change of transcription factors that  
456 bind to the BMP negative regulators and found that their translation level was increased. They

457 were categorized into three groups (Fig. 7G): Set A (only up in *Ddx6* KO), Set B (commonly  
458 up), Set C (only up in *Dgcr8* KO). Interestingly, there was much greater number of transcripts  
459 whose translation was increased only in *Dgcr8* KO (Set C). It has been thought that DDX6  
460 would involve in all translational repression activities mediated by miRISCs, because its  
461 interaction with miRISCs occurs through the CCR4-NOT complex whose binding to miRISCs is  
462 essential for their actions (Braun et al., 2011; Fabian et al., 2011; Zekri et al., 2013; Chen et al.,  
463 2014). However, the clear segregation of three classes would imply that DDX6 has specificity of  
464 translational repression on the certain transcripts rather than being a default component of  
465 miRISCs. Therefore, our analyses supplement the mode of DDX6 action in miRISC-mediated  
466 translational repression. This study also signifies the strong impact of the miRNA-mediated gene  
467 regulation on transcription factors and signaling pathways during early embryogenesis.

468         Lastly, RNA-seq of E8.5 *Ddx6*<sup>Δ/Δ</sup> mouse embryos revealed the similar features to *Ddx6*-  
469 deficient human somatic cells. Lumb et al. (2017), reported that DDX6 is required to prevent the  
470 aberrant activation of interferon-stimulated genes (ISGs). Many immune response-related terms  
471 were enriched in the GO analysis of highly upregulated genes in *Ddx6* mutant embryos (Fig.  
472 2A). In addition, ISG genes, such as *Ifit1*, *Ifitm1*, and *Oas1*, were upregulated in *Ddx6*<sup>Δ/Δ</sup>  
473 embryos, as in the above report (Fig. S5B). Thus, our study reinforces that DDX6 plays an  
474 important role in regulating immune response-related genes. We provide a further detailed  
475 observation. When comparing RNA-seq data of *Ddx6* KO and *Dgcr8* KO ESCs, immune  
476 response-related GO terms were enriched in the genes that were commonly upregulated in *Ddx6*  
477 KO and *Dgcr8* KO or only in *Dgcr8* KO. This suggests that miRNAs have an important function  
478 regulating immune gene expression, and DDX6 again works together with the miRNA system to  
479 suppress immune gene activation. Another notable similarity is the function of DDX6 as an

480 inhibitor of aberrant activation of a certain set of genes. Cells lacking DDX6 activated ISG  
481 expression in the absence of external interferon stimulation; in our case, *Ddx6*<sup>Δ/Δ</sup> cells activated  
482 expression of negative regulators of BMP signaling to make themselves less responsive to  
483 external BMP stimulation. Cells have the ability to sense and quickly react to their environments.  
484 However, how they coordinate the intrinsic gene regulatory network with extrinsic stimuli  
485 remains elusive. Based on these observations, we conjecture that DDX6-mediated post-  
486 transcriptional RNA regulation may become an important link between intracellular processes  
487 and extracellular stimuli. This feature also emphasizes the important role of DDX6 as a gene  
488 expression regulator. The studies on DDX6 have wide applicability because it is expressed in  
489 various cell types and different developmental stages. Here we identified its embryogenic role  
490 and clearly segregated its molecular functions through a genetic dissection approach. Having  
491 insights on various DDX6 functions and corresponding molecular mechanisms would make this  
492 general RNA helicase a valuable target of gene regulation.

493

## 494 **Materials and Methods**

### 495 **Mice**

496 Mice were housed in a specific-pathogen-free animal care facility at the National Institute of  
497 Genetics (NIG). All experiments were approved by the NIG Institutional Animal Care and Use  
498 committee. *Ddx6*<sup>Δ/+</sup>, *Ddx6*<sup>lox/lox</sup>, *Rosa-CreER*<sup>T2</sup>, *Ddx6-mCherry*, *Eif4enif1* KO, *Dgcr8* KO,  
499 *Dcp2* KO mice were used in this study. The production strategy of *Ddx6*<sup>lox/lox</sup> mouse line is  
500 described in (Kato et al., 2019). *Ddx6*<sup>Δ/+</sup> mouse line was generated by electroporation of two  
501 gRNAs (targeting AACAAAGCCAACCCGGGACA and CTATGTGCTGTAGCTTAGTC) and  
502 Cas9 protein into fertilized eggs resulting in the removal of exon2. Genotyping was done by

503 primers [Ddx6-LA-Fw1: TTGTGCTGGGATGAGCCTAC; Ddx6-RA-Rv1:  
504 AGTTGCATCAACGACAGGAGAG]. *Ddx6-mCherry* reporter mouse was established in NIG  
505 by injecting a targeting vector containing mCherry with homology arms of *Ddx6* gene with  
506 Cas9-gRNA designed at the C-terminal of *Ddx6* gene and Cas9 protein. Genotyping was done by  
507 primers [mCherry-L1: GGAACAGTACGAACGCGCCG; DDX6-GR1:  
508 GACAGGTGCATGTGTTACCCC]. *Eif4enif1* KO mice and *Dgcr8* KO mice were directly  
509 obtained as F0 generation, which were produced by delivering Cas9 protein and guide RNAs  
510 targeting (“TCTGGTTCATACCGTAGTTT”, “AACTTACTTTCGTATAGCGA” for *Eif4enif1*  
511 exon2) and (“TGAATCCTAATTGCACCCGT”, “GAACAGGAAGCATAACGGGTA”,  
512 “TGGGTCGGTCTGCAGAGTTG” for *Dgcr8* exon4 & 5) into the fertilized eggs via  
513 electroporation. Similar strategy was used to establish *Dcp2* KO mouse line, two gRNAs  
514 targeting “AACAAAGCCAACCCGG” and “CGCGGCACTGAAGTGT” and Cas9 protein were  
515 delivered via electroporation. The mouse line that has correctly deleted exon2 was selected and  
516 expanded. The homozygous KO pups were acquired by crossing *Dcp2* heterozygous mice.  
517 • For conditional deletion of the floxed *Ddx6* alleles, 600  $\mu$ L of 10 mg/mL tamoxifen was  
518 administered to the pregnant females.

519

## 520 **Establishment of ES cells**

521 • *Ddx6* KO: *Ddx6* $\Delta^{+/+}$  mice were intercrossed and blastocysts were collected from the uterus on  
522 E3.5. Collected blastocysts were cultured on mitomycin-treated mouse embryonic fibroblast  
523 feeder cells in 2i-LIF medium (ESGRO Complete Basal medium (Millipore, Germany)  
524 supplemented with leukemia inhibitory factor (Wako, Tokyo, Japan), 0.4  $\mu$ M MEK inhibitor  
525 PD0325901 (Wako, Tokyo, Japan), 3  $\mu$ M GSK3 inhibitor CHIR99021 (Wako, Tokyo, Japan)

526 and Penicillin-Streptomycin (Invitrogen). Blastocyst outgrowths were disaggregated and  
527 passaged onto the new wells plated with feeder cells in the same medium condition. Once ES  
528 cell colonies developed, they were expanded for genotyping and the storage. Genotyping was  
529 done with primers [Ddx6-LA-Fw1: TTGTGCTGGGATGAGCCTAC; Ddx6-RA-Rv1:  
530 AGTTGCATCAACGACAGGAGAG].

531 • *Dcp2* KO: Firstly, *Dcp2* cKO ES line was established by replacing the endogenous exon2 with  
532 the floxed exon2 through CRISPR/Cas9-mediated homologous recombination. *Dcp2* KO ES line  
533 was acquired by incubating cKO ESCs in culture medium containing 4-Hydroxytamoxifen (4-  
534 OHT). Genotyping was done with primers [Dcp2-LA-Fw1: TTCTGCTGCTTTCAAGCCTGG;  
535 Dcp2-int2-R2: ACATTCGCTACAACAACGCTTC].

536 • *Eif4enif1* KO: was also generated by deleting floxed exon2 from conditional KO ESCs,  
537 established by replacing the endogenous exon2 with the floxed exon2 through CRISPR/Cas9-  
538 mediated homologous recombination. Genotyping was done with primers [4ET-int1-F1:  
539 GTGACAGGCACTTTCCAGCAG; 4ET-int2-R1: TTCAAAGCCTTAGCTGCTTCTC].

540 • *Dgcr8* KO: was established by deleting exon4 and a part of exon5 using two Cas9 vectors  
541 targeting “TGAATCCTAATTGCACCCGT” and “TGGGTCGGTCTGCAGAGTTG.” CRISPR  
542 direct (<http://crispr.dbcls.jp/>) was used to find Cas9 target sites, and the target sequence was  
543 integrated into a modified px330 Cas9 vector (addgene), which contains the pgk-puromycin  
544 cassette. ESC transfection was done with Lipofectamine 2000 (Invitrogen). Genotyping was  
545 done with primers [Dgcr8-int3-F2: GCTCCTGGAGTAGGCATGTTG ; Dgcr8-ex5-R1:  
546 TTCACTTGTCACAGGGCTCC].

547

548



549 **Immunostaining**

550 • For frozen section immunohistochemistry, embryos were fixed in 4% paraformaldehyde for 30  
551 min at 4°C, submerged in 10% sucrose for 1~2 hours, in 20% sucrose overnight at 4°C, and  
552 frozen in Tissue-Tek O.C.T. compound (Sakura Finetek, Tokyo, Japan). Each 6 µm-thickness  
553 section was applied to glass slides. After blocking with 3% skim milk in PBS-T (PBS with 0.1%  
554 Tween20 (Sigma-Aldrich)) at room temperature for 45 min, samples were incubated with  
555 primary antibodies overnight at 4°C. The primary antibodies are listed in Table 1. Next day,  
556 samples were washed with PBS-T and incubated with secondary antibodies labeled with Alexa  
557 Fluor 488, 594, 647 (1:1000 dilution in PBS-T, Invitrogen) for 1 hr 10 min at room temperature.  
558 DNA was counterstained with DAPI (100 ng/mL). Images were acquired by the Olympus  
559 FV1200 confocal microscope and processed with FV10-ASW (version 4.0) software.

560 • For whole-mount immunostaining, embryos were fixed in 4% paraformaldehyde for 30 min at  
561 4°C, and permeabilized with 1% Triton X-100 in PBS for 30 min. Blocking was done with 10%  
562 FBS and 1% BSA for 1hr at room temperature. Samples were then incubated with primary  
563 antibodies for one overnight at 4°C, and secondary antibody reaction was done for another  
564 overnight at 4°C. Images were taken by the Olympus FV1200 confocal microscope.

565 • For immunocytochemistry, cells were fixed in 4% paraformaldehyde for 12 min at room  
566 temperature, then permeabilized with 0.3% Triton X-100 in PBS for 12 min at room temperature  
567 and blocked with 3% skim milk in PBS-T for 45 min at room temperature. After blocking, cells  
568 were incubated with primary antibodies overnight at 4°C. Next day, samples were incubated with  
569 secondary antibodies for 1 hr at room temperature and counterstained with DAPI. Images were  
570 acquired by the Olympus FV1200 confocal microscope or Leica DM6000 FS light microscope.  
571

572 **Whole-mount *in situ* hybridization**

573 Probe generation and whole-mount embryo ISH procedures were followed by the protocol  
574 described before (Biris and Yamaguchi, 2014).

575

576 **RNA-seq**

577 • E8.5 embryos

578 RNAs were collected from E8.5 embryos using TRIzol Reagent (Thermo Fisher Scientific).

579 Genotyping was done with extraembryonic tissue or yolk sac and further confirmed by qPCR

580 after acquiring cDNA. 300 ~ 420 ng of RNA was used for E8.5 cDNA library generation with

581 the KAPA-Stranded mRNA-seq kit (Illumina Platforms, KR0960-v5.17).

582 • ESC & EpiLCs of WT, *Ddx6* KO, *Eif4enif1* KO, *Dcp2* KO, and *Dgcr8* KO

583 RNA from ESC and EpiLC Day2 samples were extracted using RNAiso Plus (Takara, Tokyo,

584 Japan) according to manufacturer's instruction. RNAs were selected by polyA. Two ESC cDNA

585 libraries (three *Dgcr8* KO ESC) & three EpiLC Day2 cDNA libraries were generated for each

586 genotype group. For *Dgcr8* KO EpiLC case, the reads of one library suggested possible

587 contamination, so we excluded that library. n = 2 for *Dgcr8* KO EpiLC. cDNA libraries were

588 generated using TruSeq Stranded mRNA (illumina, 20020595) following the accompanied

589 protocol. Samples were sequenced by NovaSeq 6000 (101 bp paired-end sequencing). Average

590 47 million read pairs per sample.

591

592 **Bioinformatics analysis**

593 • E8.5 embryos

594 For all libraries, Low-quality sequences, adapters and polyA or T were trimmed or removed  
595 using Cutadapt (version 2.8) (Martin, 2011) with the following options: "-e 0.1 -q 20 -m 20 -O 3  
596 -a GATCGGAAGAGCACACGTCTGAACTCCAGTCAC -a A{100} -a T{100}". The raw  
597 reads and processed reads were checked using FastQC (version 0.11.7,  
598 <http://www.bioinformatics.babraham.ac.uk/projects/fastqc/>). To map the reads to the mouse  
599 reference genome, the UCSC mm10 mouse reference genome (fasta) and gene annotation  
600 (General Transfer Format (GTF)) file were downloaded from Illumina iGenomes  
601 ([https://sapac.support.illumina.com/sequencing/sequencing\\_software/iGenome.html](https://sapac.support.illumina.com/sequencing/sequencing_software/iGenome.html)). To  
602 increase the mapping accuracy of splicing reads, splicing-site and exon information were  
603 extracted from the gene annotation GTF file using the Python scripts  
604 `hisat2_extract_splice_sites.py` and `hisat2_extract_exons.py`, respectively, from the HISAT2  
605 (version 2.1.0) package (Kim, 2015). The HISAT2 index files of the reference genome were built  
606 including the extracted genomic information using "hisat2-build" command with options: "--ss"  
607 and "--exon". Clean reads were then mapped to the HISAT2 index files using the HISAT2 with  
608 default options. The obtained Sequence Alignment Map (SAM) files were sorted by genomic  
609 coordinates and converted to Binary Alignment Map (BAM) files using SAMtools (version 1.9)  
610 (Li et al., 2009) "sort" command with option: "-O BAM". Raw read counts per gene were  
611 calculated using featureCounts (version 2.0.0) (Liao et al., 2014) with options: "-s 2 -t exon -g  
612 gene\_id -a iGenomes/mm10/Annotation/Genes/genes.gtf". Normalized counts were calculated  
613 by the trimmed mean of M-values (TMM) method using edgeR (version 3.28.1) (Robinson et al.,  
614 2009) on R (version 3.6.3) [<https://cran.r-project.org/>]. Principal component analysis (PCA) were  
615 performed on the log2 transformed normalized counts obtained from the "cpm" function in the  
616 edgeR using the "prcomp" function in the R with default options. The detection of differentially

617 expressed genes (DEGs) were performed using the edgeR with the cut-off criteria of log<sub>2</sub> (fold  
618 change) > 1 or < -1. Gene ontology term enrichment analysis was done via Metascape (Zhou et  
619 al., 2019).

620

621 • ESC & EpiLC of WT, *Ddx6* KO, *Eif4enif1* KO, *Dcp2* KO, and *Dgcr8* KO

622 For all libraries, Low-quality sequences, adapters were trimmed or removed using fastp (version  
623 0.20.0) (Chen et al., 2018) with the following options: "-G -3 -n 1 -l 80". For preparation for  
624 mapping reads to the mouse reference genome, the Ensembl mouse reference genome (release-  
625 102, Mus\_musculus.GRCm38.dna\_sm.primary\_assembly.fa.gz) and the gene annotation GTF  
626 file (Mus\_musculus.GRCm38.102.gtf.gz) were downloaded from the Ensembl ftp site  
627 (<http://ftp.ensembl.org/>). To increase mapping accuracy of splicing reads, splicing-site and exon  
628 information were extracted from the gene annotation GTF file using the Python scripts  
629 `hisat2_extract_splice_sites.py` and `hisat2_extract_exons.py`, respectively, from the HISAT2  
630 (version 2.2.1) package. The HISAT2 index files of the reference genome were built including  
631 the extracted genomic information using "hisat2-build" command with options: "--ss" and "--  
632 exon". Clean reads were then mapped to the HISAT2 index files using the HISAT2 with default  
633 options. The obtained SAM files were sorted by genomic coordinates and converted to BAM  
634 files using SAMtools (version 1.13) "sort" command with option: "-O BAM". Raw read counts  
635 per gene were calculated using featureCounts (version 2.0.3) with options: "-s 2 -p --  
636 countReadPairs -B --primary -t exon -g gene\_id -a Mus\_musculus.GRCm38.102.gtf", and then  
637 low-abundance genes were removed by removing the genes with total number of mapped reads <  
638 10 among 26 samples. Normalized counts and statistical values for differential gene expression  
639 analysis were calculated by the default settings through the steps: 1. estimation of size factors, 2.

640 estimation of dispersion, and 3. Negative Binomial GLM fitting and Wald statistics using the  
641 Bioconductor DESeq2 packages (version 1.32.0) (Love et al., 2014) in the R (version 4.1.1). For  
642 checking the gene expression correlation between samples, the pair-wise scatter plot was  
643 produced using  $\log_2(\text{the normalized counts} + 1)$ , the “cor” function with the parameter  
644 "method='spearman', use='pairwise.complete.obs'" and ggplot2 packages (Wickham, 2016) in  
645 the R. For PCA, the variance stabilizing transformed (vst) normalized counts were calculated  
646 using the vst function of the DESeq2 with the default settings and PCA was performed with the  
647 top 500 most variable genes using the DESeq2's plotPCA function. For checking DEGs, MA  
648 plots for each comparison between sample groups were produced using the results of the  
649 DESeq2 analysis and the ggplot2. The detection of DEGs were performed using the DESeq2  
650 with the cut-off criteria of adjusted p-value  $< 0.05$  and  $\log_2(\text{Fold Change}) > 2$  or  $< -2$ . Gene  
651 ontology enrichment term analysis was done via Metascape.

652

### 653 **Gene set enrichment analysis**

654 Gene set enrichment analysis was implemented via the R package ‘fgsea’ (Subramanian et al.,  
655 2005; Sergushichey, 2016) using the genes pre-ranked on the basis of Wald statistic values of  
656 ESCs obtained from DESeq2 as ‘stat’. Used gene set was the ‘Biological Processes’ gene set  
657 collection from MSigDB v7.4 (Liberzon et al., 2011).

658

### 659 **Polysome profiling data analysis**

660 Polysome profiling RNA-seq data of *Ddx6* KO and *Dgcr8* KO ESCs were obtained from Freimer  
661 et al., 2018 (GSE112767). Translation level was assessed by examining high polysome (4+  
662 ribosomes) counts. Statistical significance was tested by student’s t-test.

663

## 664 **RT-qPCR**

665 Embryos were frozen in RNAiso Plus (Takara) and extracted according to manufacturer's  
666 instruction. RNA of cultured cells was extracted by RNeasy Mini Kits (Qiagen, Germany).  
667 Extracted RNA was treated with Recombinant DNaseI (Thermo Scientific) for 30 min at 37°C,  
668 and processed for reverse transcription using SuperScript III or IV Reverse Transcriptase  
669 (Invitrogen). Quantitative PCR was performed using KAPA SYBR Fast qPCR Kits (Nippon  
670 Genetics, Japan) on Dice Real Time System Single Thermal Cycler (Takara) or CFX96 Real-  
671 Time System (BioRad) machine. The primer sequences are listed in Table 2. The expression  
672 level was normalized to *Gapdh* gene and the relative expression was calculated by  $\Delta\Delta C_T$  method.

673

## 674 **Statistical analysis**

675 Statistical significance for *in vitro* experiments was examined by the Student's t-test. \* $p \leq 0.05$ ,  
676 \*\* $p \leq 0.01$ , \*\*\* $p \leq 0.001$  and \*\*\*\* $p \leq 0.0001$ . Statistical significance for embryo RT-qPCR  
677 experiments was assayed by Wilcoxon rank sum test. \* $\alpha = 0.05$ , \*\* $\alpha = 0.01$ . Error bars represent  
678 s.e.m.

679

## 680 **ESC-to-EpiLC induction**

681 A detailed protocol is described in (Hayashi et al., 2011). After feeder depletion,  $1.3 \times 10^5$  ESCs  
682 were plated on the well of 12-well plate pre-coated with fibronectin for 1 hr at 37°C. Medium  
683 was changed every day.

684

685

686 **Monolayer differentiation**

687 After feeder depletion,  $7 \times 10^4$  ESCs were plated on the well of 24-well plate pre-coated with

688 gelatin. Cells were incubated with ESGRO Complete Basal medium (Millipore, Germany).

689

690 **Data availability**

691 • E8.5 embryo RNA-seq data have been deposited in the Gene Expression Omnibus (GEO)

692 under accession code GSE171156.

693 • ESC & EpiLC RNA-seq data have been deposited in the Gene Expression Omnibus (GEO)

694 under accession code GSE187390.

695

696 **Table 1. Antibodies**

| Antigen                   | Usage    | Concentration | Manufacturer         | Reference #   |
|---------------------------|----------|---------------|----------------------|---------------|
| <b>Rck/p54<br/>(DDX6)</b> | IHC, ICC | 1:300         | MBL                  | PD009         |
| <b>DCP1A</b>              | IHC, ICC | 1:200         | ABNOVA               | H00055802-M06 |
| <b>BRACHYURY</b>          | IHC      | 1:400         | R&D SYSTEMS          | O15178        |
| <b>NANOG</b>              | IHC      | 1:200         | NOVUS<br>BIOLOGICALS | NB100-58842   |
| <b>TuJ1</b>               | IHC      | 1:1500        | Abcam                | Ab18207       |
| <b>SOX1</b>               | IHC      | 1:100         | NOVUS<br>BIOLOGICALS | AF3369        |

| Antigen            | Usage | Concentration | Manufacturer                 | Reference #   |
|--------------------|-------|---------------|------------------------------|---------------|
| <b>SOX2 (Y-17)</b> | IHC   | 1:200         | SANTA CRUZ<br>BIOTECHNOLOGY  | sc-17320      |
| <b>DCX</b>         | IHC   | 1:400         | Cell Signaling<br>TECHNOLOGY | (A8L1U) 14802 |

697

698 **Table 2. qPCR primer list**

| Gene           | Forward (5'-to-3')           | Reverse (5'-to-3')         |
|----------------|------------------------------|----------------------------|
| <i>Accn4</i>   | AGGAGGCAGGGGATGAA<br>CA      | TGAGGTGAGTAGGGCCA<br>GTG   |
| <i>Alx3</i>    | GCTACCAGTGGATTGCCG<br>AG     | GCTCCCGAGCATACACGT<br>C    |
| <i>Cer1</i>    | CTACAGGAGGAAGCCAA<br>GAGGTTC | TGGGCAATGGTCTGGTTG<br>AAGG |
| <i>Chordin</i> | CTGCGCTCAAGTTTACGC<br>TTC    | AGGGTGTTC AACAGGA<br>TGTTG |
| <i>Dcx</i>     | ATGCAGTTGTCCCTCCAT<br>TC     | ATGCCACCAAGTTGTCAT<br>CA   |
| <i>Ddx6</i>    | TCCTATCCAGGAGGAGA            | ATGAGGTAGGCACCGCTT         |



| <b>Gene</b>   | <b>Forward (5'-to-3')</b>      | <b>Reverse (5'-to-3')</b>    |
|---------------|--------------------------------|------------------------------|
| <i>Dpysl2</i> | GCATT                          | TT                           |
|               | CAGAATGGTGATTCCCGG<br>AGG      | CAGCCAATAGGCTCGTCC           |
| <i>Eomes</i>  | CCTTCACCTTCTCAGAGA<br>CACAGTT  | TCGATCTTTAGCTGGGTG<br>ATATCC |
|               | <i>Fgf5</i>                    | GCTGTGTCTCAGGGGATT<br>GT     |
| <i>Fzd4</i>   | TGCCAGAACCTCGGCTAC<br>A        | ATGAGCGGCGTGAAAGT<br>TGT     |
| <i>Gapdh</i>  | TGTGTCCGTCGTGGATCT<br>GA       | TTGCTGTTGAAGTCGCAG<br>GAG    |
| <i>Hes7</i>   | ACCAGGGACCAGAACCT<br>CC        | GGCTTCGCTCCCTCAAGT<br>AG     |
| <i>Isl1</i>   | AGATTATATCAGGTTGTA<br>CGGGATCA | ACACAGCGGAAACACTC<br>GAT     |
| <i>Kdm6b</i>  | CCCCATTTCAGCTGACT<br>AA        | CTGGACCAAGGGGTGTG<br>TT      |
| <i>Klf4</i>   | CTTCAGCTATCCGATCCG<br>GG       | GAGGGGCTCACGTCATTG<br>AT     |

| <b>Gene</b>   | <b>Forward (5'-to-3')</b>       | <b>Reverse (5'-to-3')</b>  |
|---------------|---------------------------------|----------------------------|
| <i>Lgals9</i> | GGCGCAAACAGAAACT<br>CAGAA       | ACGGGTAAAGCCCATTG<br>GA    |
| <i>Nanog</i>  | TTGCTTACAAGGGTCTGC<br>TACT      | ACTGGTAGAAGAATCAG<br>GGCT  |
| <i>Nodal</i>  | CCTGGAGCGCATTGAT<br>G           | ACTTTTCTGCTCGACTGG<br>ACA  |
| <i>Noggin</i> | GCCGAGCGAGATCAAAG<br>G          | TCTTGCTCAGGCGCTGTT<br>T    |
| <i>Oct4</i>   | TCACCTTGGGGTACACCC<br>AG        | CATGTTCTTAAGGCTGAG<br>CTGC |
| <i>Pai1</i>   | TCATCAATGACTGGGTGG<br>AA        | TGCTGGCCTCTAAGAAAG<br>GA   |
| <i>Pax6</i>   | GATAACATACCAAGCGT<br>GTCATCAATA | TGCGCCCATCTGTTGCT          |
| <i>Rex1</i>   | ACGAGGTGAGTTTCCGA<br>AC         | CCTCTGTCTTCTTTGCTT<br>C    |
| <i>Sox1</i>   | GCAGCGTTTCCGTGACTT<br>TAT       | GGCAGAACCACAGGAAA<br>GAAA  |
| <i>Sox2</i>   | GCGGAGTGGAAGCTTTG               | CGGGAAGCGTGTACTTAT         |

| Gene         | Forward (5'-to-3')        | Reverse (5'-to-3')          |
|--------------|---------------------------|-----------------------------|
| <i>Sox17</i> | TCC                       | CCTT                        |
|              | GAGGGCCAGAAGCAGTG<br>TTA  | AGTGATTGTGGGGAGCA<br>AGT    |
| <i>T</i>     | CTCGGATTCACATCGTGA<br>GAG | AAGGCTTTAGCAAATGG<br>GTTGTA |
|              | <i>Tbx6</i>               | ATGTACCATCCACGAGA<br>GTTGT  |
| <i>Xdh</i>   | CGATGACGAGGACAACG<br>GT   | TGAAGGCGGTCATACTTG<br>GAG   |
|              | <i>Zic3</i>               | CAAGAGGACCCATACAG<br>GTGAGA |

699

## 700 **Acknowledgments**

701 We appreciate Prof. Ken Kurokawa for the support of transcriptomic analyses work. We also  
702 thank Dr. Danelle Wright for proofreading and Ms. Kumiko Inoue for supporting the mouse  
703 care.

704

705

706

707

708 **References**

- 709 Aizer, A., Kalo, A., Kafri, P., Shraga, A., Ben-Yishay, R., Jacob, A., Kinor, N., & Shav-Tal, Y.  
710 (2014). Quantifying mRNA targeting to P-bodies in living human cells reveals their dual role in  
711 mRNA decay and storage. *Journal of Cell Science*, 127(20). <https://doi.org/10.1242/jcs.152975>  
712
- 713 Andrei, M. A., Ingelfinger, D., Heintzmann, R., Achsel, T., Rivera-Pomar, R., & Lührmann, R.  
714 (2005). A role for eIF4E and eIF4E-transporter in targeting mRNPs to mammalian processing  
715 bodies. *RNA*, 11(5). <https://doi.org/10.1261/rna.2340405>  
716
- 717 Argelaguet, R., Clark, S. J., Mohammed, H., Stapel, L. C., Krueger, C., Kapourani, C. A., Imaz-  
718 Rosshandler, I., Lohoff, T., Xiang, Y., Hanna, C. W., Smallwood, S., Ibarra-Soria, X., Buettner,  
719 F., Sanguinetti, G., Xie, W., Krueger, F., Göttgens, B., Rugg-Gunn, P. J., Kelsey, G., ... Reik,  
720 W. (2019). Multi-omics profiling of mouse gastrulation at single-cell resolution. *Nature*,  
721 576(7787).  
722
- 723 Arnold, S. J., Hofmann, U. K., Bikoff, E. K., & Robertson, E. J. (2008). Pivotal roles for  
724 eomesodermin during axis formation, epithelium-to-mesenchyme transition and endoderm  
725 specification in the mouse. *Development*, 135(3).  
726
- 727 Ayache, J., Bénard, M., Ernoult-Lange, M., Minshall, N., Standart, N., Kress, M., & Weil, D.  
728 (2015). P-body assembly requires DDX6 repression complexes rather than decay or Ataxin2/2L  
729 complexes. *Molecular Biology of the Cell*, 26(14). <https://doi.org/10.1091/mbc.E15-03-0136>  
730

731 Biris, K. K., & Yamaguchi, T. P. (2014). Two-color in situ hybridization of whole-mount mouse  
732 embryos. *Methods in Molecular Biology*, 1092. [https://doi.org/10.1007/978-1-60327-292-6\\_2](https://doi.org/10.1007/978-1-60327-292-6_2)  
733

734 Braun, J. E., Huntzinger, E., Fauser, M., & Izaurralde, E. (2011). GW182 proteins directly  
735 recruit cytoplasmic deadenylase complexes to miRNA targets. *Molecular Cell*, 44(1).  
736 <https://doi.org/10.1016/j.molcel.2011.09.007>  
737

738 Brennan, J., Lu, C. C., Norris, D. P., Rodriguez, T. A., Beddington, R. S. P., & Robertson, E. J.  
739 (2001). Nodal signalling in the epiblast patterns the early mouse embryo. *Nature*, 411(6840).  
740

741 Brook, F. A., & Gardner, R. L. (1997). The origin and efficient derivation of embryonic stem  
742 cells in the mouse. *Proceedings of the National Academy of Sciences of the United States of*  
743 *America*, 94(11).  
744

745 Burgold, T., Spreafico, F., De Santa, F., Totaro, M. G., Prosperini, E., Natoli, G., & Testa, G.  
746 (2008). The histone H3 lysine 27-specific demethylase Jmjd3 is required for neural commitment.  
747 *PLoS ONE*, 3(8).  
748

749 Candia, A. F., Watabe, T., Hawley, S. H. B., Onichtchouk, D., Zhang, Y., Derynck, R., Niehrs,  
750 C., & Cho, K. W. Y. (1997). Cellular interpretation of multiple TGF- $\beta$  signals: Intracellular  
751 antagonism between activin/BVg1 and BMP-2/4 signaling mediated by Smads. *Development*,  
752 124(22).  
753

754 Chen, S., Zhou, Y., Chen, Y., & Gu, J. (2018). Fastp: An ultra-fast all-in-one FASTQ  
755 preprocessor. *Bioinformatics*, 34(17). <https://doi.org/10.1093/bioinformatics/bty560>  
756

757 Chen, Y., Boland, A., Kuzuoğlu-Öztürk, D., Bawankar, P., Loh, B., Chang, C. Te,  
758 Weichenrieder, O., & Izaurralde, E. (2014). A DDX6-CNOT1 Complex and W-Binding Pockets  
759 in CNOT9 Reveal Direct Links between miRNA Target Recognition and Silencing. *Molecular*  
760 *Cell*, 54(5). <https://doi.org/10.1016/j.molcel.2014.03.034>  
761

762 Chu, C. Y., & Rana, T. M. (2006). Translation repression in human cells by MicroRNA-induced  
763 gene silencing requires RCK/p54. *PLoS Biology*, 4(7).  
764

765 Coller, J. M., Tucker, M., Sheth, U., Valencia-Sanchez, M. A., & Parker, R. (2001). The DEAD  
766 box helicase, Dhh1p, functions in mRNA decapping and interacts with both the decapping and  
767 deadenylase complexes. *RNA*, 7(12).  
768

769 Coller, J., & Parker, R. (2005). General translational repression by activators of mRNA  
770 decapping. *Cell*, 122(6).  
771

772 Costello, I., Pimeisl, I. M., Dräger, S., Bikoff, E. K., Robertson, E. J., & Arnold, S. J. (2011).  
773 The T-box transcription factor Eomesodermin acts upstream of *Mesp1* to specify cardiac  
774 mesoderm during mouse gastrulation. *Nature Cell Biology*, 13(9).  
775

776 Dassi, E. (2017). Handshakes and fights: The regulatory interplay of RNA-binding proteins. In  
777 *Frontiers in Molecular Biosciences* (Vol. 4, Issue SEP).  
778  
779 Di-Gregorio, A., Sancho, M., Stuckey, D. W., Crompton, L. A., Godwin, J., Mishina, Y., &  
780 Rodriguez, T. A. (2007). BMP signalling inhibits premature neural differentiation in the mouse  
781 embryo. *Development*, 134(18).  
782  
783 Di Stefano, B., Luo, E. C., Haggerty, C., Aigner, S., Charlton, J., Brumbaugh, J., Ji, F., Rabano  
784 Jiménez, I., Clowers, K. J., Huebner, A. J., Clement, K., Lipchina, I., de Kort, M. A. C.,  
785 Anselmo, A., Pulice, J., Gerli, M. F. M., Gu, H., Gygi, S. P., Sadreyev, R. I., ... Hochedlinger,  
786 K. (2019). The RNA Helicase DDX6 Controls Cellular Plasticity by Modulating P-Body  
787 Homeostasis. *Cell Stem Cell*, 25(5). <https://doi.org/10.1016/j.stem.2019.08.018>  
788  
789 Ellis, P., Fagan, B. M., Magness, S. T., Hutton, S., Taranova, O., Hayashi, S., McMahon, A.,  
790 Rao, M., & Pevny, L. (2004). SOX2, a persistent marker for multipotential neural stem cells  
791 derived from embryonic stem cells, the embryo or the adult. *Developmental Neuroscience*, 26(2–  
792 4). <https://doi.org/10.1159/000082134>  
793  
794 Eulalio, A., Rehwinkel, J., Stricker, M., Huntzinger, E., Yang, S. F., Doerks, T., Dorner, S.,  
795 Bork, P., Boutros, M., & Izaurralde, E. (2007). Target-specific requirements for enhancers of  
796 decapping in miRNA-mediated gene silencing. *Genes and Development*, 21(20).  
797

798 Evans, M. J., & Kaufman, M. H. (1981). Establishment in culture of pluripotential cells from  
799 mouse embryos. *Nature*, 292(5819).

800

801 Fabian, M. R., Cieplak, M. K., Frank, F., Morita, M., Green, J., Srikumar, T., Nagar, B.,  
802 Yamamoto, T., Raught, B., Duchaine, T. F., & Sonenberg, N. (2011). MiRNA-mediated  
803 deadenylation is orchestrated by GW182 through two conserved motifs that interact with CCR4-  
804 NOT. *Nature Structural and Molecular Biology*, 18(11). <https://doi.org/10.1038/nsmb.2149>

805

806 Fei, T., Xia, K., Li, Z., Zhou, B., Zhu, S., Chen, H., Zhang, J., Chen, Z., Xiao, H., Han, J. D. J.,  
807 & Chen, Y. G. (2010). Genome-wide mapping of SMAD target genes reveals the role of BMP  
808 signaling in embryonic stem cell fate determination. *Genome Research*, 20(1).

809

810 Ferraiuolo, M. A., Basak, S., Dostie, J., Murray, E. L., Schoenberg, D. R., & Sonenberg, N.  
811 (2005). A role for the eIF4E-binding protein 4E-T in P-body formation and mRNA decay.  
812 *Journal of Cell Biology*, 170(6). <https://doi.org/10.1083/jcb.200504039>

813

814 Freimer, J. W., Hu, T. J., & Blelloch, R. (2018). Decoupling the impact of MicroRNAs on  
815 translational repression versus RNA degradation in embryonic stem cells. *ELife*, 7.

816

817 Furtado, M. B., Solloway, M. J., Jones, V. J., Costa, M. W., Biben, C., Wolstein, O., Preis, J. I.,  
818 Sparrow, D. B., Saga, Y., Dunwoodie, S. L., Robertson, E. J., Tam, P. P. L., & Harvey, R. P.  
819 (2008). BMP/SMAD1 signaling sets a threshold for the left/right pathway in lateral plate  
820 mesoderm and limits availability of SMAD4. *Genes and Development*, 22(21).



821

822 Gleeson, J. G., Peter T, L., Flanagan, L. A., & Walsh, C. A. (1999). Doublecortin is a  
823 microtubule-associated protein and is expressed widely by migrating neurons. *Neuron*, 23(2).  
824

825 Hayashi, K., Ohta, H., Kurimoto, K., Aramaki, S., & Saitou, M. (2011). Reconstitution of the  
826 mouse germ cell specification pathway in culture by pluripotent stem cells. *Cell*, 146(4).  
827

828 Jankowsky, E. (2011). RNA helicases at work: Binding and rearranging. In *Trends in*  
829 *Biochemical Sciences* (Vol. 36, Issue 1).  
830

831 Kaikkonen, M. U., Lam, M. T. Y., & Glass, C. K. (2011). Non-coding RNAs as regulators of  
832 gene expression and epigenetics. In *Cardiovascular Research* (Vol. 90, Issue 3).  
833

834 Kamenska, A., Simpson, C., Vindry, C., Broomhead, H., Bénard, M., Ernoult-Lange, M., Lee, B.  
835 P., Harries, L. W., Weil, D., & Standart, N. (2016). The DDX6-4E-T interaction mediates  
836 translational repression and P-body assembly. *Nucleic Acids Research*, 44(13).  
837

838 Kato, Y., Iwamori, T., Ninomiya, Y., Kohda, T., Miyashita, J., Sato, M., & Saga, Y. (2019).  
839 ELAVL2-directed RNA regulatory network drives the formation of quiescent primordial  
840 follicles. *EMBO Reports*, 20(12).  
841

842 Katsu, K., Tatsumi, N., Niki, D., Yamamura, K. ichi, & Yokouchi, Y. (2013). Multi-modal  
843 effects of BMP signaling on Nodal expression in the lateral plate mesoderm during left-right axis  
844 formation in the chick embryo. *Developmental Biology*, 374(1).  
845

846 Kim, D., Langmead, B., & Salzberg, S. L. (2015). HISAT: A fast spliced aligner with low  
847 memory requirements. *Nature Methods*, 12(4). <https://doi.org/10.1038/nmeth.3317>  
848

849 Lawson, K. A., Dunn, N. R., Roelen, B. A. J., Zeinstra, L. M., Davis, A. M., Wright, C. V. E.,  
850 Korving, J. P. W. F. M., & Hogan, B. L. M. (1999). Bmp4 is required for the generation of  
851 primordial germ cells in the mouse embryo. *Genes and Development*, 13(4).  
852

853 Li, H., Handsaker, B., Wysoker, A., Fennell, T., Ruan, J., Homer, N., Marth, G., Abecasis, G., &  
854 Durbin, R. (2009). The Sequence Alignment/Map format and SAMtools. *Bioinformatics*, 25(16).  
855 <https://doi.org/10.1093/bioinformatics/btp352>  
856

857 Liao, Y., Smyth, G. K., & Shi, W. (2014). FeatureCounts: An efficient general purpose program  
858 for assigning sequence reads to genomic features. *Bioinformatics*, 30(7).  
859 <https://doi.org/10.1093/bioinformatics/btt656>  
860

861 Liberzon, A., Subramanian, A., Pinchback, R., Thorvaldsdóttir, H., Tamayo, P., & Mesirov, J. P.  
862 (2011). Molecular signatures database (MSigDB) 3.0. *Bioinformatics*, 27(12).  
863 <https://doi.org/10.1093/bioinformatics/btr260>  
864

865 Linder, P., & Jankowsky, E. (2011). From unwinding to clamping of the DEAD box RNA  
866 helicase family. In *Nature Reviews Molecular Cell Biology* (Vol. 12, Issue 8).  
867  
868 Liu, F., Hata, A., Baker, J. C., Doody, J., Carcamo, J., Harland, R. M., & Massague, J. (1996). A  
869 human Mad protein acting as a BMP-regulated transcriptional activator. *Nature*, 381(6583).  
870  
871 Love, M. I., Huber, W., & Anders, S. (2014). Moderated estimation of fold change and  
872 dispersion for RNA-seq data with DESeq2. *Genome Biology*, 15(12).  
873 <https://doi.org/10.1186/s13059-014-0550-8>  
874  
875 Lumb, J. H., Popov, L. M., Ding, S., Keith, M. T., Merrill, B. D., Greenberg, H. B., Carette, J.  
876 E., Li, Q., & Li, J. B. (2017). DDX6 Represses Aberrant Activation of Interferon-Stimulated  
877 Genes. *Cell Reports*, 20(4).  
878  
879 Martin, M. Cutadapt removes adapter sequences from high-throughput sequencing  
880 reads. **EMBnet.journal**, [S.l.], v. 17, n. 1, p. pp. 10-12, may 2011. ISSN 2226-6089. Available  
881 at: <<http://journal.embnet.org/index.php/embnetjournal/article/view/200>>. Date accessed: 26  
882 nov. 2021. doi:<https://doi.org/10.14806/ej.17.1.200>.  
883  
884 Massague, J. (1996). TGF $\beta$  Signaling: Minireview Receptors, Transducers, and Mad Proteins.  
885 *Cell*, 85.  
886

887 Minshall, N., Kress, M., Weil, D., & Standart, N. (2009). Role of p54 RNA helicase activity and  
888 its c-terminal domain in translational repression, p-body localization and assembly. *Molecular*  
889 *Biology of the Cell*, 20(9).

890

891 Morikawa, M., Koinuma, D., Mizutani, A., Kawasaki, N., Holmborn, K., Sundqvist, A.,  
892 Tsutsumi, S., Watabe, T., Aburatani, H., Heldin, C. H., & Miyazono, K. (2016). BMP Sustains  
893 Embryonic Stem Cell Self-Renewal through Distinct Functions of Different Krüppel-like  
894 Factors. *Stem Cell Reports*, 6(1).

895

896 Mulas, C., Kalkan, T., & Smith, A. (2017). NODAL Secures Pluripotency upon Embryonic Stem  
897 Cell Progression from the Ground State. *Stem Cell Reports*, 9(1).

898

899 Nichols, J., & Smith, A. (2009). Naive and Primed Pluripotent States. In *Cell Stem Cell* (Vol. 4,  
900 Issue 6).

901

902 Oki, S., Ohta, T., Shioi, G., Hatanaka, H., Ogasawara, O., Okuda, Y., Kawaji, H., Nakaki, R.,  
903 Sese, J., & Meno, C. (2018). ChIP-Atlas: a data-mining suite powered by full integration of  
904 public ChIP-seq data. *EMBO Reports*, 19(12). <https://doi.org/10.15252/embr.201846255>

905

906 Reversade, B., Kuroda, H., Lee, H., Mays, A., & De Robertis, E. M. (2005). Depletion of Bmp2,  
907 Bmp4, Bmp7 and Spemann organizer signals induces massive brain formation in *Xenopus*  
908 embryos. *Development*, 132(15).

909

- 910 Rivera-Pérez, J. A., & Magnuson, T. (2005). Primitive streak formation in mice is preceded by  
911 localized activation of Brachyury and Wnt3. *Developmental Biology*, 288(2).  
912 <https://doi.org/10.1016/j.ydbio.2005.09.012>  
913
- 914 Robinson, M. D., McCarthy, D. J., & Smyth, G. K. (2009). edgeR: A Bioconductor package for  
915 differential expression analysis of digital gene expression data. *Bioinformatics*, 26(1).  
916 <https://doi.org/10.1093/bioinformatics/btp616>  
917
- 918 Rossant, J. (2018). Genetic control of early cell lineages in the mammalian embryo. In *Annual*  
919 *Review of Genetics* (Vol. 52). <https://doi.org/10.1146/annurev-genet-120116-024544>  
920
- 921 Russ, A. P., Wattler, S., Colledge, W. H., Aparicio, S. A. J. R., Carlton, M. B. L., Pearce, J. J.,  
922 Barton, S. C., Azim Surani, M., Ryan, K., Nehls, M. C., Wilsons, V., & Evans, M. J. (2000).  
923 Eomesodermin is required for mouse trophoblast development and mesoderm formation. *Nature*,  
924 404(6773).  
925
- 926 Scheller, N., Mina, L. B., Galão, R. P., Chari, A., Giménez-Barcons, M., Noueiry, A., Fischer,  
927 U., Meyerhans, A., & Díez, J. (2009). Translation and replication of hepatitis C virus genomic  
928 RNA depends on ancient cellular proteins that control mRNA fates. *Proceedings of the National*  
929 *Academy of Sciences of the United States of America*, 106(32).  
930
- 931 Sergushichev, A. A. (2016). An algorithm for fast preranked gene set enrichment analysis using  
932 cumulative statistic calculation. *BioRxiv*.

933

934 Serman, A., Le Roy, F., Aigueperse, C., Kress, M., Dautry, F., & Weil, D. (2007). GW body  
935 disassembly triggered by siRNAs independently of their silencing activity. *Nucleic Acids*  
936 *Research*, 35(14).

937

938 Smith, A. (2017). Formative pluripotency: The executive phase in a developmental continuum.  
939 *Development (Cambridge)*, 144(3).

940

941 Snell, G. D., and Stevens, L.C. (1966). Early embryology. In *Biology of the Laboratory Mouse*.  
942 E. L. Green, ed. (New York: McGraw-Hill), pp. 205-245

943

944 Soh, G. H., Pomreinke, A. P., & Müller, P. (2020). Integration of Nodal and BMP Signaling by  
945 Mutual Signaling Effector Antagonism. *Cell Reports*, 31(1).

946 <https://doi.org/10.1016/j.celrep.2020.03.051>

947

948 Subramanian, A., Tamayo, P., Mootha, V. K., Mukherjee, S., Ebert, B. L., Gillette, M. A.,  
949 Paulovich, A., Pomeroy, S. L., Golub, T. R., Lander, E. S., & Mesirov, J. P. (2005). Gene set  
950 enrichment analysis: A knowledge-based approach for interpreting genome-wide expression  
951 profiles. *Proceedings of the National Academy of Sciences of the United States of America*,  
952 102(43). <https://doi.org/10.1073/pnas.0506580102>

953

954 Tanner, N. K., & Linder, P. (2001). DExD/H box RNA helicases: From generic motors to  
955 specific dissociation functions. In *Molecular Cell (Vol. 8, Issue 2)*.

956

957 Teo, A. K. K., Arnold, S. J., Trotter, M. W. B., Brown, S., Ang, L. T., Chng, Z., Robertson, E. J.,  
958 Dunn, N. R., & Vallier, L. (2011). Pluripotency factors regulate definitive endoderm  
959 specification through eomesodermin. *Genes and Development*, 25(3).

960

961 Thomson, J. A., Kalishman, J., Golos, T. G., Durning, M., Harris, C. P., Becker, R. A., & Hearn,  
962 J. P. (1995). Isolation of a primate embryonic stem cell line. *Proceedings of the National*  
963 *Academy of Sciences of the United States of America*, 92(17).

964

965 Thomson, J. A. (1998). Embryonic stem cell lines derived from human blastocysts. *Science*,  
966 282(5391).

967

968

969 Tropepe, V., Hitoshi, S., Sirard, C., Mak, T. W., Rossant, J., & Van Der Kooy, D. (2001). Direct  
970 neural fate specification from embryonic stem cells: A primitive mammalian neural stem cell  
971 stage acquired through a default mechanism. *Neuron*, 30(1).

972

973 Vallier, L., Mendjan, S., Brown, S., Ching, Z., Teo, A., Smithers, L. E., Trotter, M. W. B., Cho,  
974 C. H. H., Martinez, A., Rugg-Gunn, P., Brons, G., & Pedersen, R. A. (2009). Activin/Nodal  
975 signalling maintains pluripotency by controlling Nanog expression. *Development*, 136(8).

976

977 Wang, Y., Medvid, R., Melton, C., Jaenisch, R., & Blelloch, R. (2007). DGCR8 is essential for  
978 microRNA biogenesis and silencing of embryonic stem cell self-renewal. *Nature Genetics*, 39(3).  
979 <https://doi.org/10.1038/ng1969>

980

981 Wang, Y., Arribas-Layton, M., Chen, Y., Lykke-Andersen, J., & Sen, G. L. (2015). DDX6  
982 Orchestrates Mammalian Progenitor Function through the mRNA Degradation and Translation  
983 Pathways. *Molecular Cell*, 60(1).

984

985 Weston, A., & Sommerville, J. (2006). Xp54 and related (DDX6-like) RNA helicases: Roles in  
986 messenger RNP assembly, translation regulation and RNA degradation. *Nucleic Acids Research*,  
987 34(10).

988

989 Wickham H (2016). *ggplot2: Elegant Graphics for Data Analysis*. Springer-Verlag New York.  
990 ISBN 978-3-319-24277-4, <https://ggplot2.tidyverse.org>.

991

992 Winnier, G., Blessing, M., Labosky, P. A., & Hogan, B. L. M. (1995). Bone morphogenetic  
993 protein-4 is required for mesoderm formation and patterning in the mouse. *Genes and  
994 Development*, 9(17).

995

996 Wood, H. B., & Episkopou, V. (1999). Comparative expression of the mouse Sox1, Sox2 and  
997 Sox3 genes from pre-gastrulation to early somite stages. *Mechanisms of Development*, 86(1–2).

998



999 Yang, S. H., Andrabi, M., Biss, R., Murtuza Baker, S., Iqbal, M., & Sharrocks, A. D. (2019).  
1000 ZIC3 Controls the Transition from Naive to Primed Pluripotency. *Cell Reports*, 27(11).  
1001  
1002 Ying, Q. L., Stavridis, M., Griffiths, D., Li, M., & Smith, A. (2003). Conversion of embryonic  
1003 stem cells into neuroectodermal precursors in adherent monoculture. *Nature Biotechnology*,  
1004 21(2).  
1005  
1006 Zhang, H., & Bradley, A. (1996). Mice deficient for BMP2 are nonviable and have defects in  
1007 amnion/chorion and cardiac development. *Development*, 122(10).  
1008  
1009 Zhou, Y., Zhou, B., Pache, L., Chang, M., Khodabakhshi, A. H., Tanaseichuk, O., Benner, C., &  
1010 Chanda, S. K. (2019). Metascape provides a biologist-oriented resource for the analysis of  
1011 systems-level datasets. *Nature Communications*, 10(1). [https://doi.org/10.1038/s41467-019-](https://doi.org/10.1038/s41467-019-09234-6)  
1012 09234-6  
1013  
1014  
1015  
1016  
1017  
1018  
1019  
1020  
1021

1022 **Figure Legends**

1023

1024 **Table 1. *Ddx6* knockout results in embryonic lethality by E11.5.**

1025

1026 **Figure 1. Characterization of *Ddx6*<sup>Δ/Δ</sup> embryos.**

1027 (A) *Ddx6*<sup>Δ/Δ</sup> embryos exhibit growth delay and morphological defects. E6.5 (scale: 100 μm),

1028 E7.5 & E8.5 (200 μm), E9.5 (100 μm for group; 200 μm for KO), and E10.5 (500 μm).

1029 (B-D) Gene expression analyses by RNA-seq.

1030 (B) Gene ontology (GO) term enrichment analysis of most upregulated and downregulated

1031 genes.

1032 (C) RNA-seq data comparing expression of negative regulators of the BMP pathway in E8.5

1033 *Ddx6* KOs with that in E8.5 WT.

1034 (D) Classification of types of the upregulated negative regulators of BMP signaling.

1035

1036 **Figure 2. *Ddx6*<sup>Δ/Δ</sup> embryos have defects in mesoderm development.**

1037 (A) Whole-mount ISH of E8.5 embryos with an *Otx2* probe (100μm, n = 3).

1038 (B-C) RNA-seq data comparing expression of several key genes in E8.5 *Ddx6* KOs with that in

1039 E8.5 WT. (B) primitive streak and early mesoderm-related genes. (C) differentiated mesoderm

1040 and endoderm markers. PSM: paraxial mesoderm, LPM: lateral plate mesoderm, DE: definitive

1041 endoderm.

1042 (D) Whole-mount ISH of E8.5 embryos with a *Brachyury* probe (100 μm, n = 5).

1043 (E) E6.5 & E7.5 embryo frozen section IHC for T (50 μm for E6.5, n = 2; 100 μm for E7.5, n =

1044 3).

1045 (F) Whole-mount ISH of E7.5 & E8.5 embryos with a *Nodal* probe (scale: 100  $\mu\text{m}$  for E7.5 &  
1046 E8.5 Type III; 200  $\mu\text{m}$  for E8.5 Control & Type II, n = 4 for E7.5, n = 3 for E8.5).

1047 (G) Whole-mount ISH of E7.5 & E8.5 embryos with an *Eomes* probe (100  $\mu\text{m}$ , n = 3 for each  
1048 time point).

1049

1050 **Figure 3. Precocious neural induction and premature differentiation are observed in**

1051 *Ddx6* $\Delta/\Delta$  embryos.

1052 (A) E6.5 embryo frozen section IHC for SOX1 (50  $\mu\text{m}$  for lower magnification, n = 2).

1053 (B-C) RNA-seq data comparing expression of several key genes in E8.5 *Ddx6* KOs with that in  
1054 E8.5 WT. (B) NSC and radial glial cell (NPC) markers. (C) genes related to neuron-restricted  
1055 intermediate progenitor & differentiated neuron.

1056 (D) E8.5 embryo frozen section IHC for SOX1 & SOX2 (scale: 100  $\mu\text{m}$ , n = 3).

1057 (E) E8.5 embryo frozen section IHC for DCX (100  $\mu\text{m}$ , n = 3).

1058

1059 **Figure 4. E8.5 *Ddx6* $\Delta/\Delta$  embryos retain strong naive and primed pluripotency.**

1060 (A) RNA-seq data comparing expression of pluripotency marker genes in E8.5 *Ddx6* KOs with  
1061 that in E8.5 WT.

1062 (B) E6.5~E8.5 embryo frozen section IHC for NANOG (scale: 50  $\mu\text{m}$  for E6.5, n = 2; 100  $\mu\text{m}$   
1063 for E7.5, n = 3 for E7.5 & E8.5).

1064

1065 **Figure 5. Characterization of *Ddx6* $\Delta/\Delta$  pluripotent cells.**

1066 (A) Cell counting of ESCs over three-day culture period. Mean  $\pm$  SEM. The statistical  
1067 significance was calculated by Student's t test (n = 5).

1068 (B) RT-qPCR examining relative expression of pluripotency markers in *Ddx6*<sup>Δ/Δ</sup> ESCs to WT  
1069 ESCs. Mean ± SEM. Student's t test (n = 7~9).  
1070 (C) Cell counting during ESC-to-EpiLC induction period. Mean ± SEM. Student's t test (n = 13  
1071 for WT, n = 7 for *Ddx6*<sup>Δ/Δ</sup>).  
1072 (D) RT-qPCR examining the expression pattern of *Nodal*, *Fgf5* and *Zic3*. Mean ± SEM.  
1073 Student's t test (n = 9 for *Nodal* & *Fgf5*, n = 7 for *Zic3*) (\*p ≤ 0.05, \*\*p ≤ 0.01, \*\*\*p ≤ 0.001,  
1074 \*\*\*\*p ≤ 0.0001).  
1075 (E-F, H-I) RT-qPCR analysis of the expression trend of several key genes during EpiLC  
1076 induction period. Each bar represents the relative expression of *Ddx6*<sup>Δ/Δ</sup> cells to WT cells at the  
1077 indicated time point. Mean ± SEM. Student's t test.  
1078 (E) major pluripotency genes (n = 7~9). (F) early neuroectoderm and mesendoderm lineage  
1079 markers (n = 7~9). (H) BMP-SMAD1/5 target genes (n = 5). (I) the negative regulators of BMP  
1080 signaling (n = 6~9).  
1081 (G) TuJ1 ICC on Day1 of monolayer differentiation (scale: 50 μm) (n = 3).

1082

1083 **Figure 6. Conditional depletion of DDX6 quickly upregulates expressions of the BMP**  
1084 **signaling inhibitors and *Nodal*.**

1085 (A) Tamoxifen was injected at E6.5. Whole-mount DDX6 immunostaining confirmed that the  
1086 complete depletion of DDX6 takes about 1 day (n = 3).  
1087 (B) E8.5 cKO embryos exhibited similar phenotypes to conventional KO embryos (scale: 500  
1088 μm for group, 100 μm for KO17, 200 μm for KO12) (n = 6).  
1089 (C) RT-qPCR analysis of several key genes in *Ddx6* cKO E8.5 embryos. The ratio of mutants  
1090 with a milder phenotype was higher among cKO embryos, thus most embryos that were used for

1091 RT-qPCR analysis looked similar to the KO12 embryo. Mean  $\pm$  SEM. The statistical  
1092 significance was calculated by Wilcoxon rank sum test ( $n = 9\sim 10$ ) (\*  $\alpha = 0.05$  significance level,  
1093 \*\*  $\alpha = 0.01$ ).

1094

1095 **Figure 7. Genetic dissection of the DDX6 functions found that the DDX6-miRNA pathway**  
1096 **has a crucial role during early embryogenesis.**

1097 (A) A scheme of genetic dissection of the DDX6-mediated RNA regulatory pathways. Three  
1098 major DDX6-mediated pathways were disrupted by knocking out the key gene of each pathway.

1099 (B) PCA plot of ESC and EpiLC Day2 of each genotype group.

1100 (C) *Dgcr8* KO embryos exhibit similar morphology to *Ddx6* KO embryos. (E8.5 images, scale:  
1101 200  $\mu\text{m}$  for WT & *Ddx6* KO, 100  $\mu\text{m}$  for *Dgcr8* KO,  $n \geq 3$ ; E9.5 images, 500  $\mu\text{m}$  for WT, 200  
1102  $\mu\text{m}$  for *Ddx6* KO & *Dgcr8* KO,  $n \geq 3$ ).

1103 (D) Comparison of gene expression between *Ddx6* KO and *Dgcr8* KO. RT-qPCR analysis of the  
1104 expression trend of several key genes during EpiLC induction period. Each bar represents the  
1105 relative expression of KO cells to WT cells at the indicated time point. Mean  $\pm$  SEM. Student's t  
1106 test ( $n \geq 3$ ) (\* $p \leq 0.05$ , \*\* $p \leq 0.01$ , \*\*\* $p \leq 0.001$ , \*\*\*\* $p \leq 0.0001$ ).

1107 (E) GSEA enrichment plot of the “negative regulation of BMP signaling pathway” gene set in  
1108 *Ddx6* KO and *Dgcr8* KO ESC as compared to WT ESC. Black bars represent the position of the  
1109 genes that are belong to this gene set ( $n = 45$ ) in the whole ranked gene list. The green line shows  
1110 the overall distribution of this gene set (whether over-represented at the top (left) or bottom  
1111 (right) of the ranked list of genes).

1112 (F) The table showing which transcription factor (column) binds to which negative regulator of  
1113 BMP signaling (row). Green color: Set A; Navy: Set B; Purple: Set C from Fig. 7G.

1114 (G) Analysis of the translation level change of transcription factors that bind to the BMP  
1115 negative regulators. Only the transcripts that showed statistically significant change are shown in  
1116 this graph ( $p \leq 0.05$ ). Set A was increased only in *Ddx6* KO (5 genes). Set B in both (9 genes)  
1117 and Set C only in *Dgcr8* KO (17 genes).

1118

1119 **Figure 8. Schemes describing developmental defects caused by loss of DDX6-mediated**  
1120 **RNA regulation.**

1121 (A) Development of the three primary embryonic germ layers is largely affected by DDX6.  
1122 Neuroectoderm is specified earlier than WT whereas the formation of primitive streak is delayed  
1123 (The smaller size of *Ddx6* mutant is not reflected on the images).

1124 (B) Changes in cell-lineage specification from pluripotent stem cells caused by *Ddx6* loss is  
1125 depicted on a horizontal diagram. Uncommitted *Ddx6*<sup>Δ/Δ</sup> pluripotent cells possess promoted  
1126 pluripotency and strongly favor commitment to the neuronal lineage. In WT embryos,  
1127 mesendoderm lineage arises at ~E6.5 as the primitive streak is formed, and three germ layers are  
1128 simultaneously developed at ~E7.5. In *Ddx6* KO embryos, premature neural induction occurs  
1129 while one day delay of the primitive streak formation is observed. During mesendoderm  
1130 segregation, definitive endoderm specification is increased whereas mesoderm specification is  
1131 greatly reduced due to the patterning defect of the primitive streak. Posterior epiblast cells cannot  
1132 exit the pluripotency on time, which would also impede differentiation processes.

1133

1134 **Supplementary figure legend**

1135 **Supplementary Figure 1. DDX6 expression in early embryos.**

1136 (A) E6.5 embryo frozen section IHC for DDX6 and DCP1A.

1137 (B) E7.5 embryo frozen section IHC for BRACHYURY & DDX6.

1138 (C) (1-3) E8.5 embryo frozen section IHC for DDX6. (4) Imaging of E8.5 embryo expressing

1139 DDX6-mCherry (scale for (1): 100  $\mu$ m).

1140

1141 **Supplementary Figure 2. Detailed phenotypes of *Ddx6* KO embryos.**

1142 (A) Variations in the morphology of E8.5 *Ddx6* KO embryos (scale: 200  $\mu$ m).

1143 (B) Two types of E9.5 *Ddx6* KO embryos: (1) some mid-posterior body developed, (2) severe

1144 posterior truncation (scale: 200, 100, 200, 200  $\mu$ m).

1145 (C) RT-qPCR analysis of some key genes in *Ddx6* KO E8.5 embryos. Most embryos used for

1146 this analysis were Type III mutants. Mean  $\pm$  SEM. The statistical significance was calculated by

1147 Wilcoxon rank sum nonparametric test (n = 10, 8, 12, 12, 8, 9, 10, 9, 8, 13, 8, 10, 5, 7 in order of

1148 genes listed) (\* at the  $\alpha = 0.05$  significance level, \*\*  $\alpha = 0.01$ ).

1149

1150 **Supplementary Figure 3. DDX6 and P-body expression in pluripotent cells.**

1151 (A) ICC of DDX6 and a P-body marker DCP1A during ESC-to-EpiLC induction period.

1152 (B) Distinct granular P-bodies were disappeared in the absence of DDX6. ICC of DCP1A on

1153 ESCs.

1154

1155 **Supplementary Figure 4. Examination of individual DDX6-mediated RNA regulatory**

1156 **pathway.**

1157 (A) P-bodies in ESCs were affected by deletion of each gene. ICC of DDX6, a P-body marker,

1158 on ESCs.

1159 (B) E9.5 *Eif4enif1* KO embryo and a littermate control (scale: 500  $\mu$ m, n = 7).

1160 (C) E9.5 *Dcp2* KO embryos and a littermate control (scale: 500  $\mu\text{m}$ , n = 3).  
1161 (D) Venn diagram showing the number of differentially expressed genes in *Ddx6* KO and *Dgcr8*  
1162 KO ESCs. GO term enrichment analyses.  
1163 (E) GSEA enrichment plot of the “negative regulation of BMP signaling pathway” gene set in  
1164 *Eif4enif1* KO and *Dcp2* KO ESC as compared to WT ESC. Black bars represent the position of  
1165 the genes that are belong to this gene set (n = 45) in the whole ranked gene list. The green line  
1166 shows the overall distribution of this gene set (whether over-represented at the top (left) or  
1167 bottom (right) of the ranked list of genes). The table includes the detailed results.

1168

1169 **Supplementary Figure 5.**

1170 (A) TuJ1 expression in the epiblast. E6.5~E8.5 embryo frozen section IHC for TuJ1 & T (50  $\mu\text{m}$   
1171 for E6.5, n = 2; 100  $\mu\text{m}$  for lower magnification, 50  $\mu\text{m}$  for higher magnification, n = 3 for E7.5  
1172 & E8.5).

1173 (B) RNA-seq data comparing expression of interferon-stimulated genes (ISGs) in E8.5 *Ddx6*  
1174 KO1 library (green) and *Ddx6* KO2 library (navy) with that in E8.5 WT.

1175

1176

1177



Table 1

| Time point | +/+        | $\Delta$ /+ | $\Delta$ / $\Delta$ | Total |
|------------|------------|-------------|---------------------|-------|
| E6.5       | 1 (7.1%)   | 8 (57.1%)   | 5 (35.7%)           | 14    |
| E7.5       | 26 (41%)   | 32 (51%)    | 5 (8%)              | 63    |
| E8.5       | 72 (33%)   | 120 (55%)   | 28 (13%)            | 220   |
| E9.5       | 17 (23%)   | 43 (59%)    | 13 (18%)            | 73    |
| E10.5      | 12 (42.9%) | 11 (39.3%)  | 5 (17.9%)           | 28    |
| E11.5      | 11 (44%)   | 14 (56%)    | 0                   | 25    |
| E12.5      | 7 (30%)    | 16 (70%)    | 0                   | 23    |

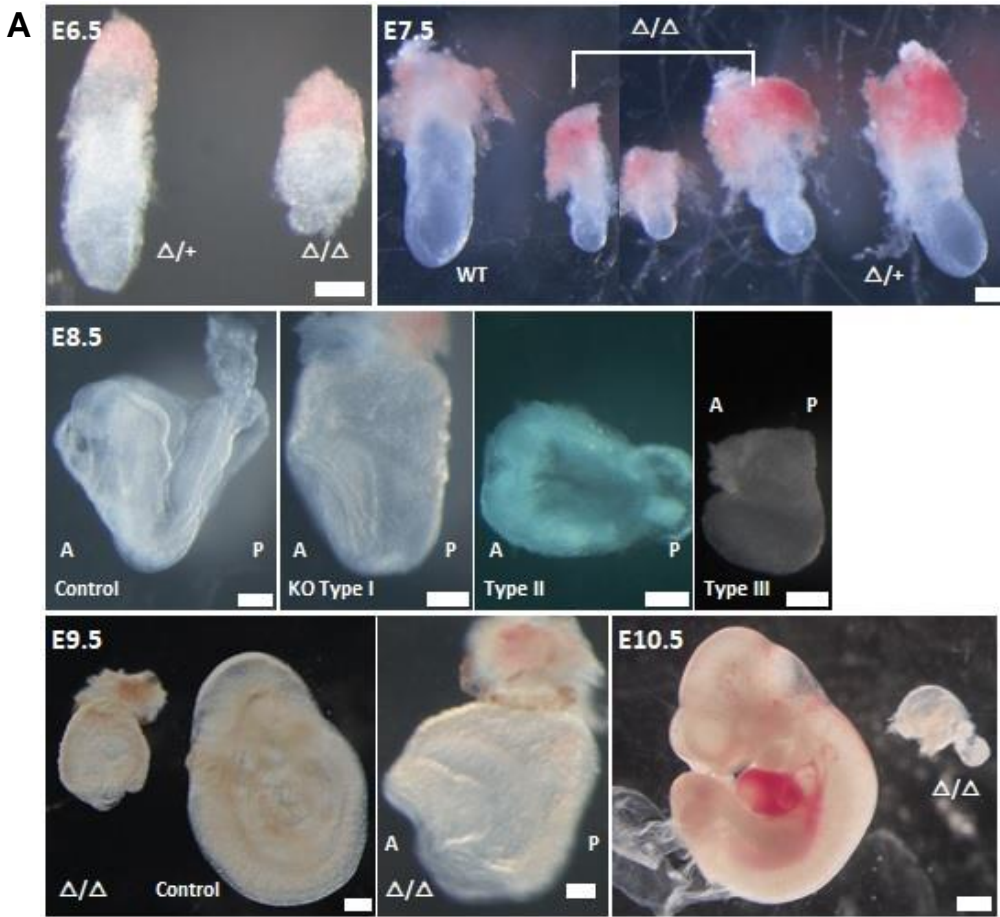

**B** Upregulated genes in *Ddx6* KO embryos

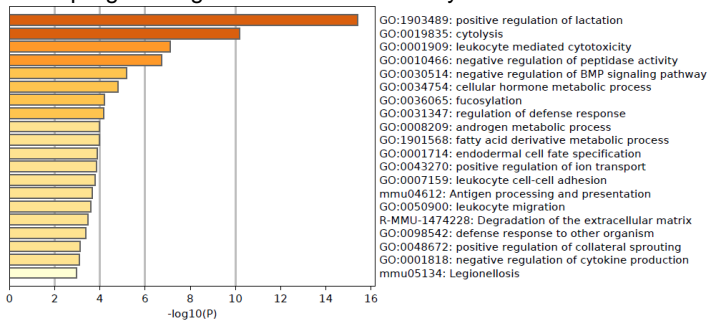

Downregulated genes in *Ddx6* KO embryos

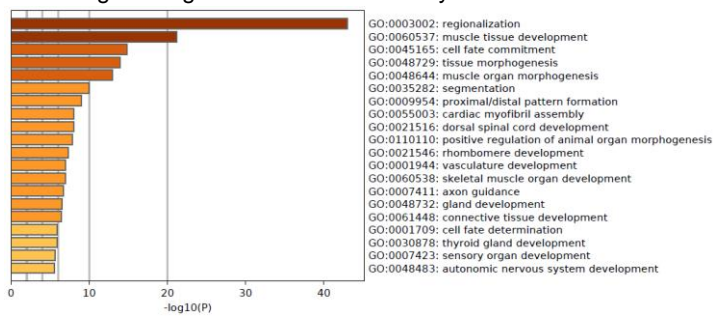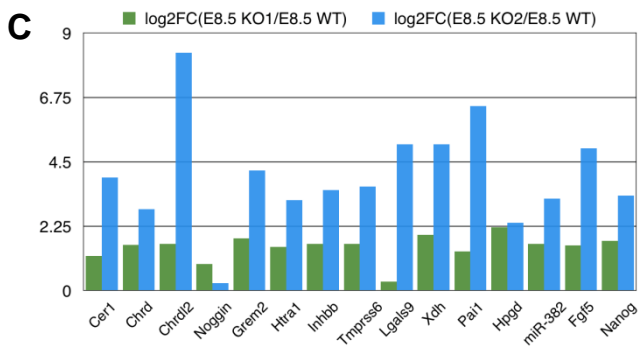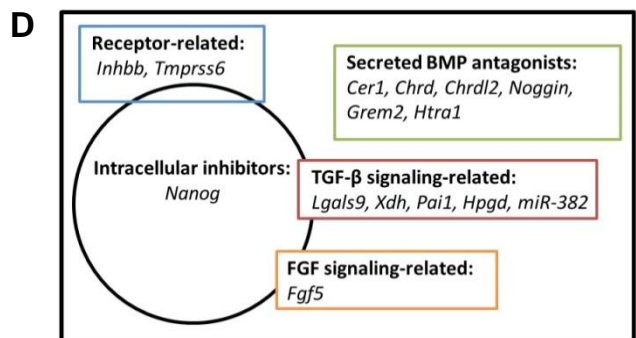

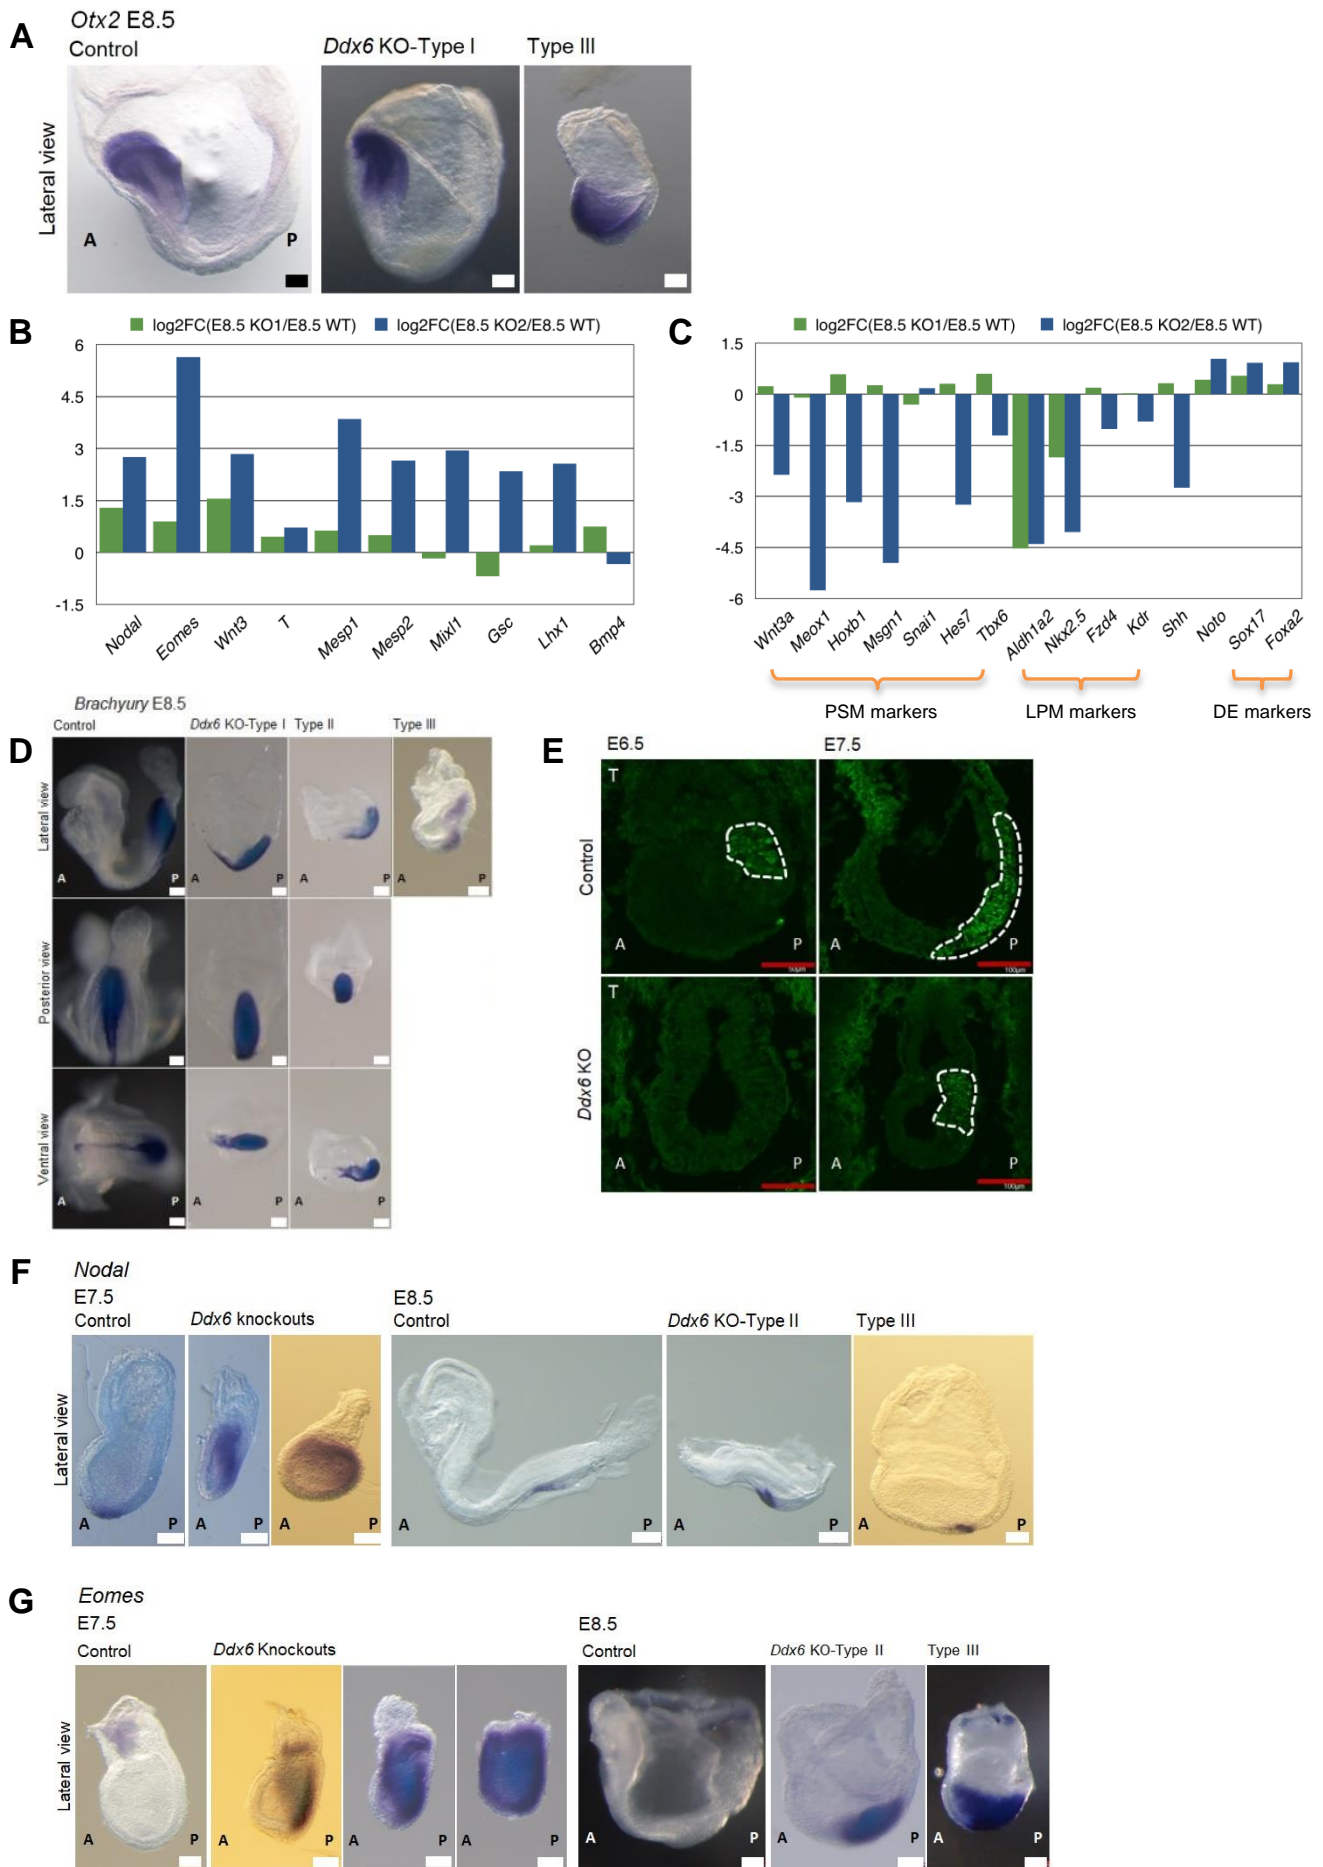

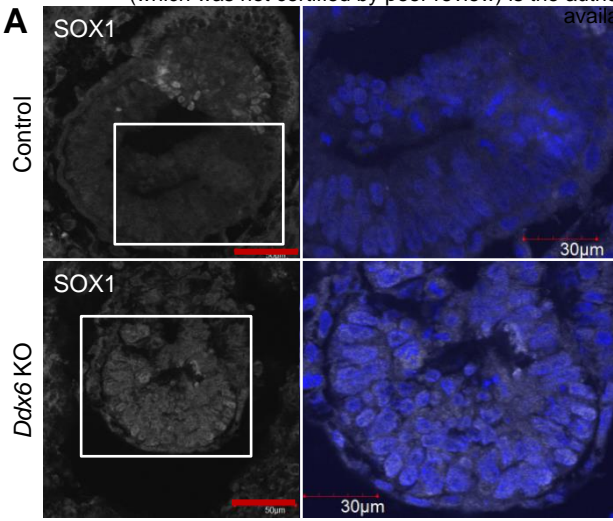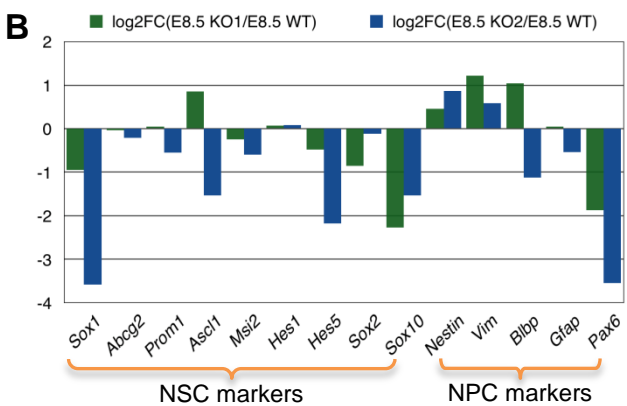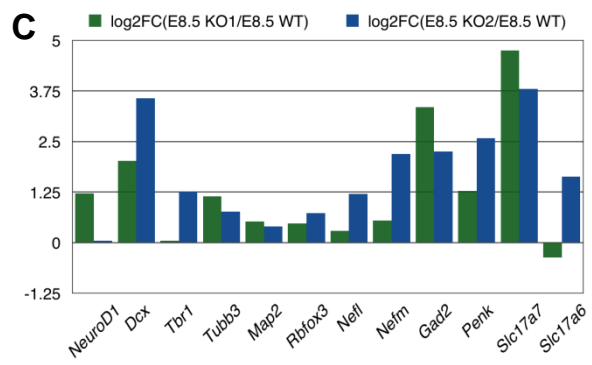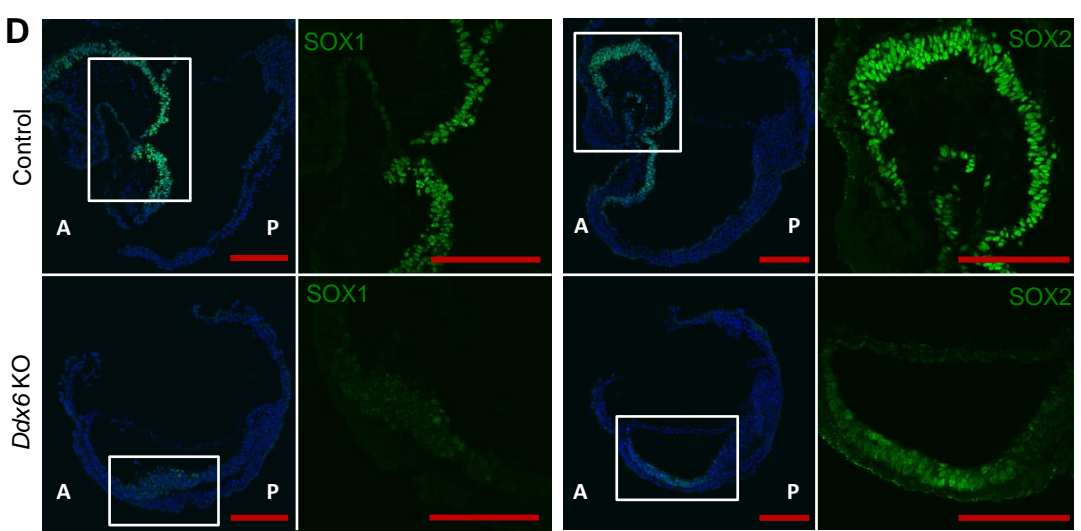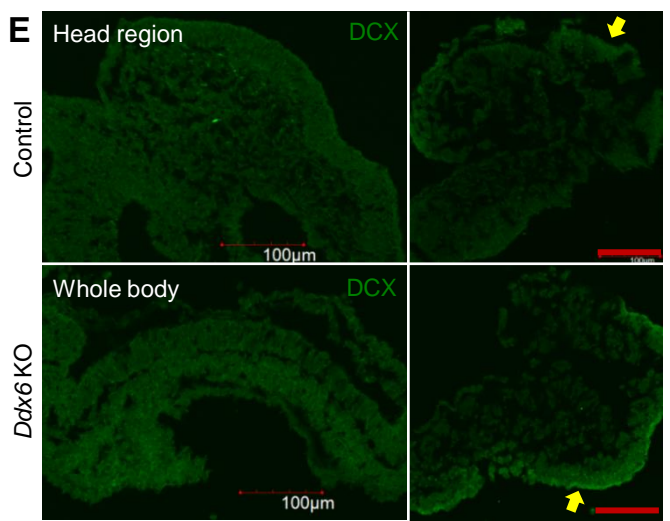

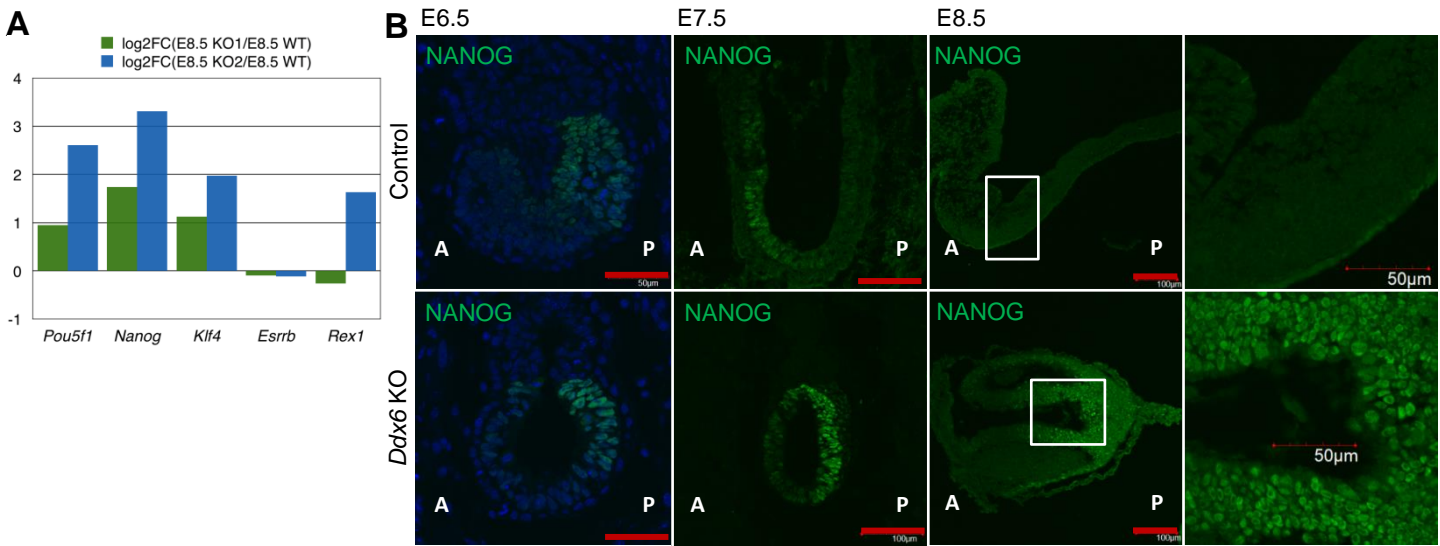

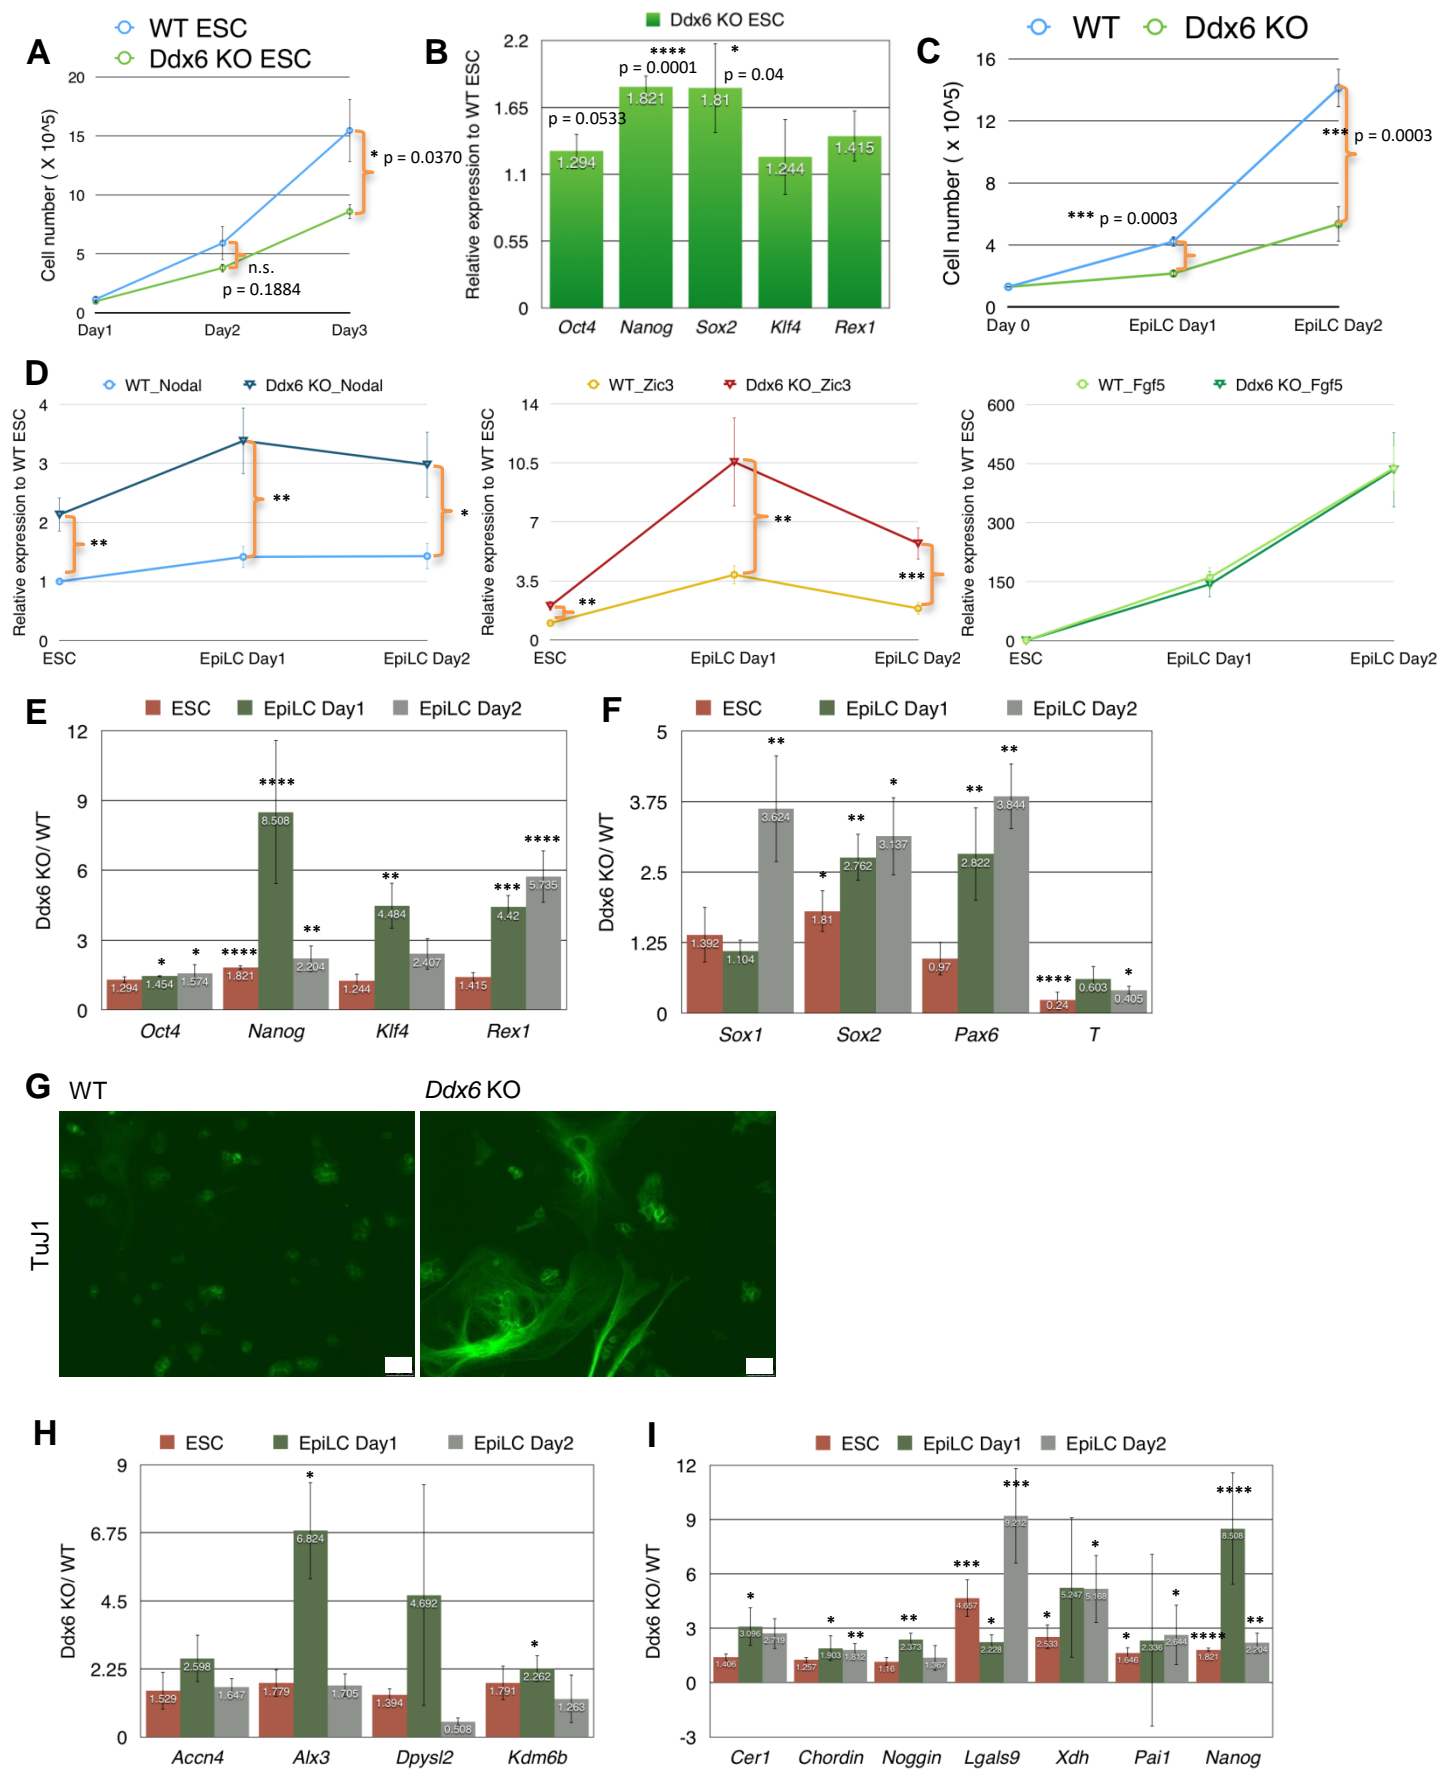

Fig. 6

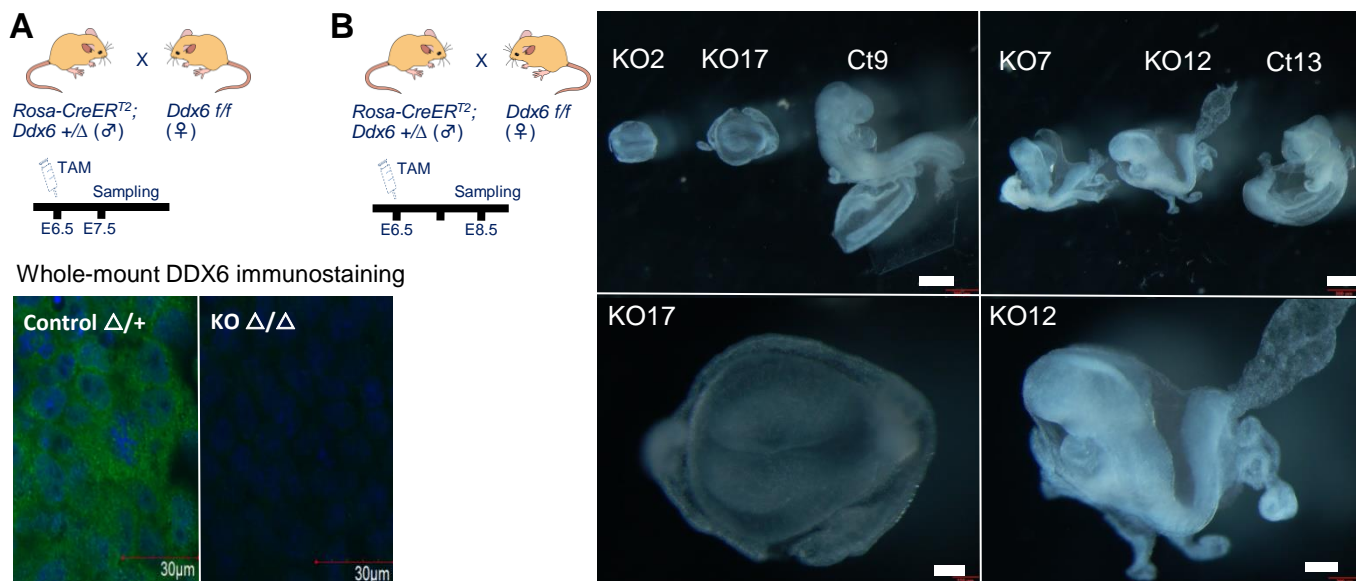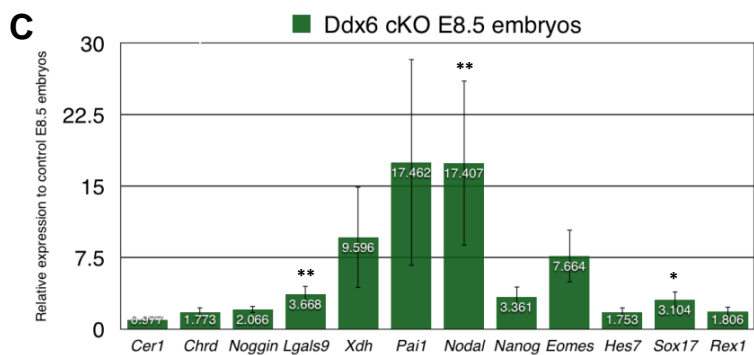





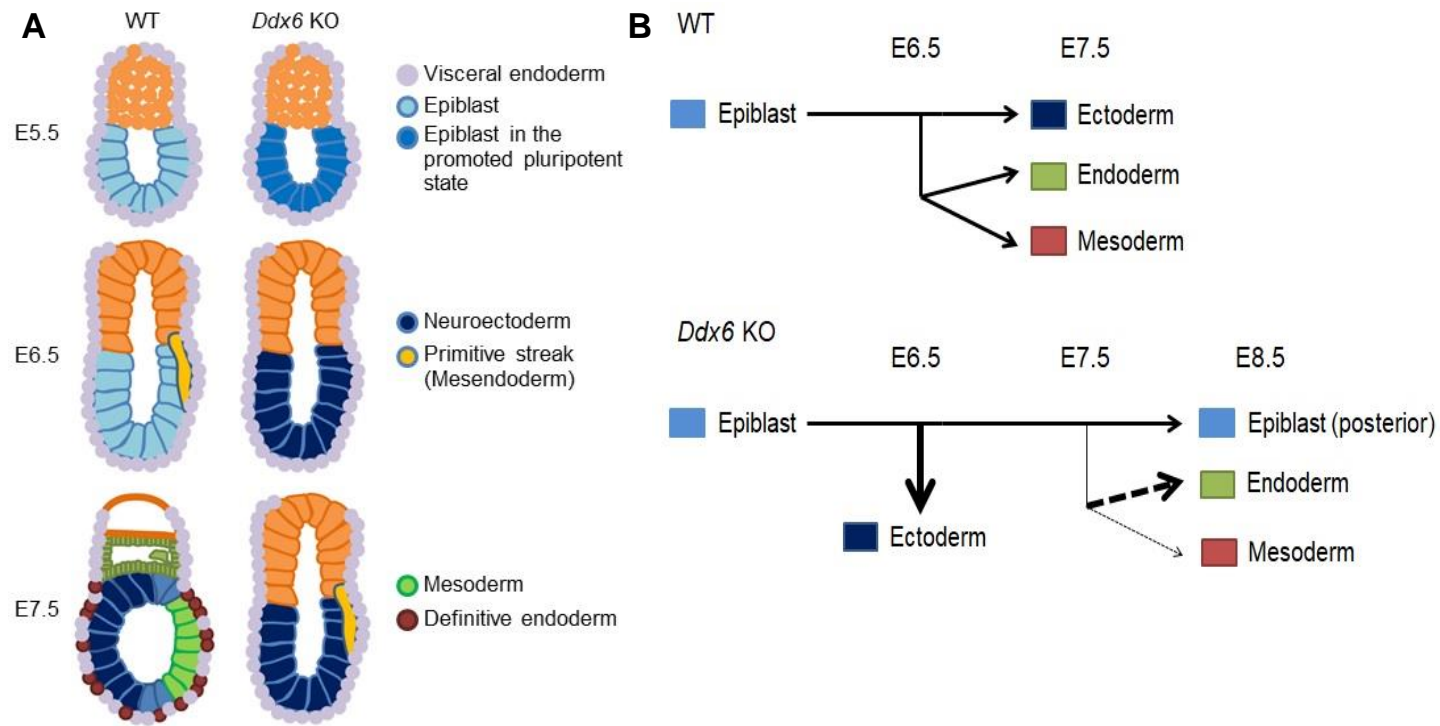

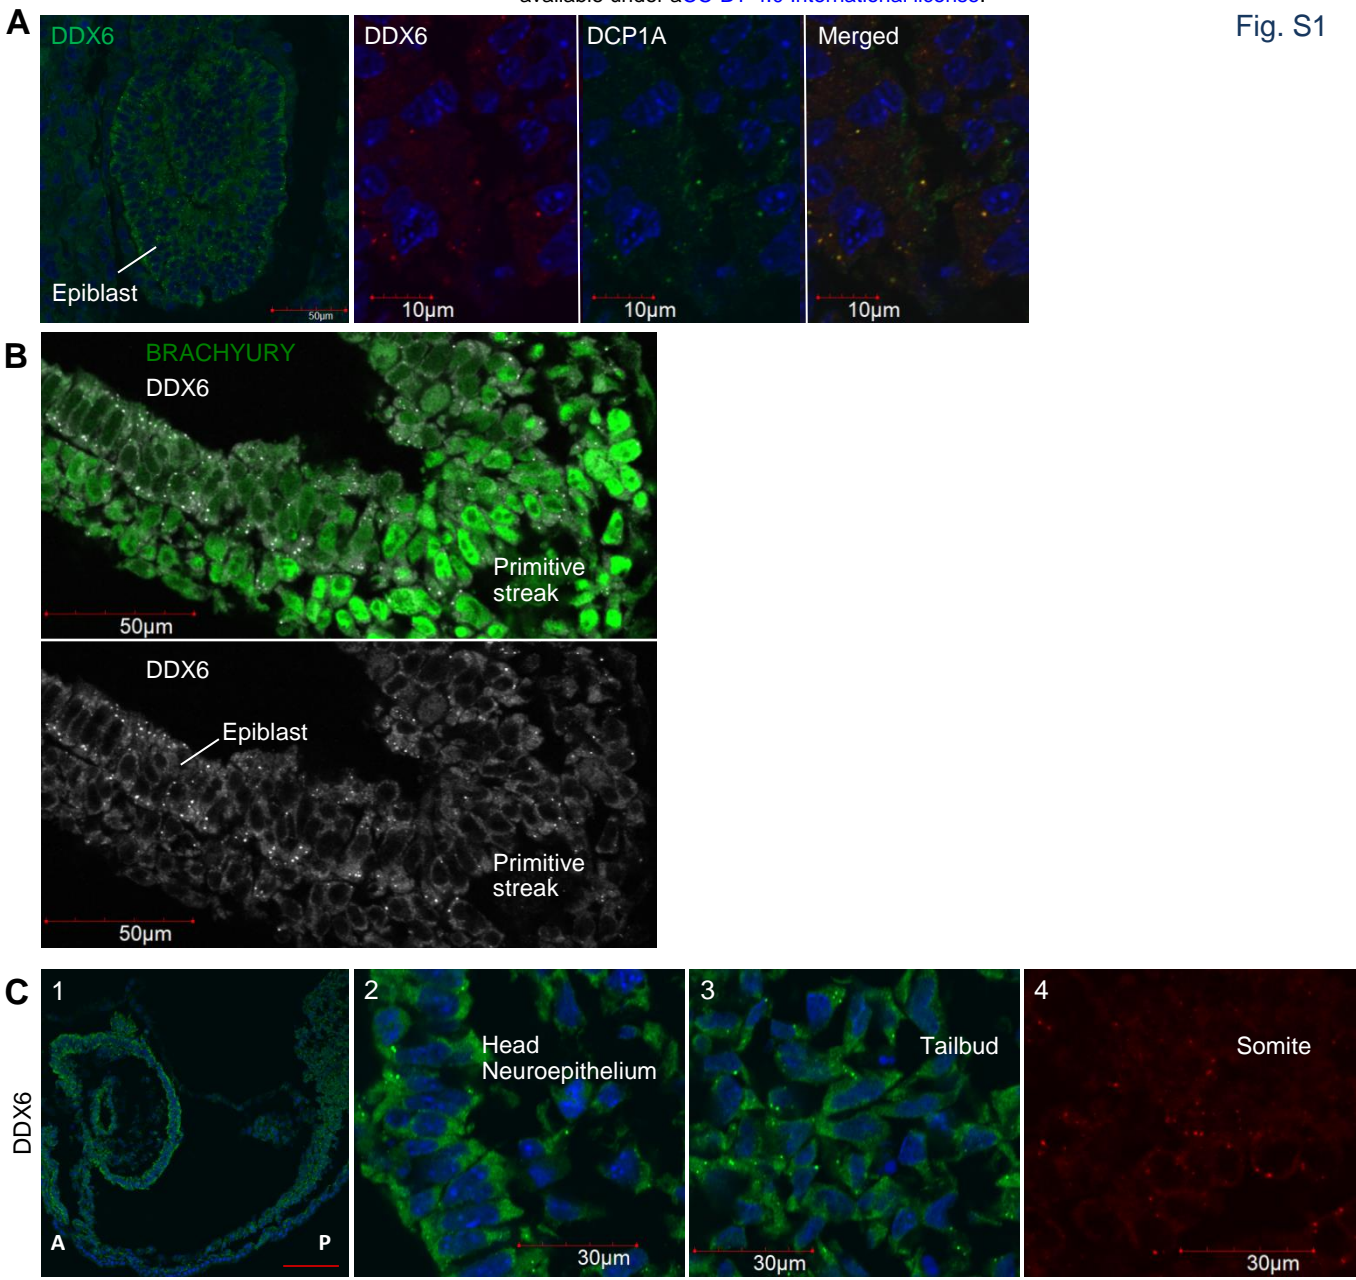

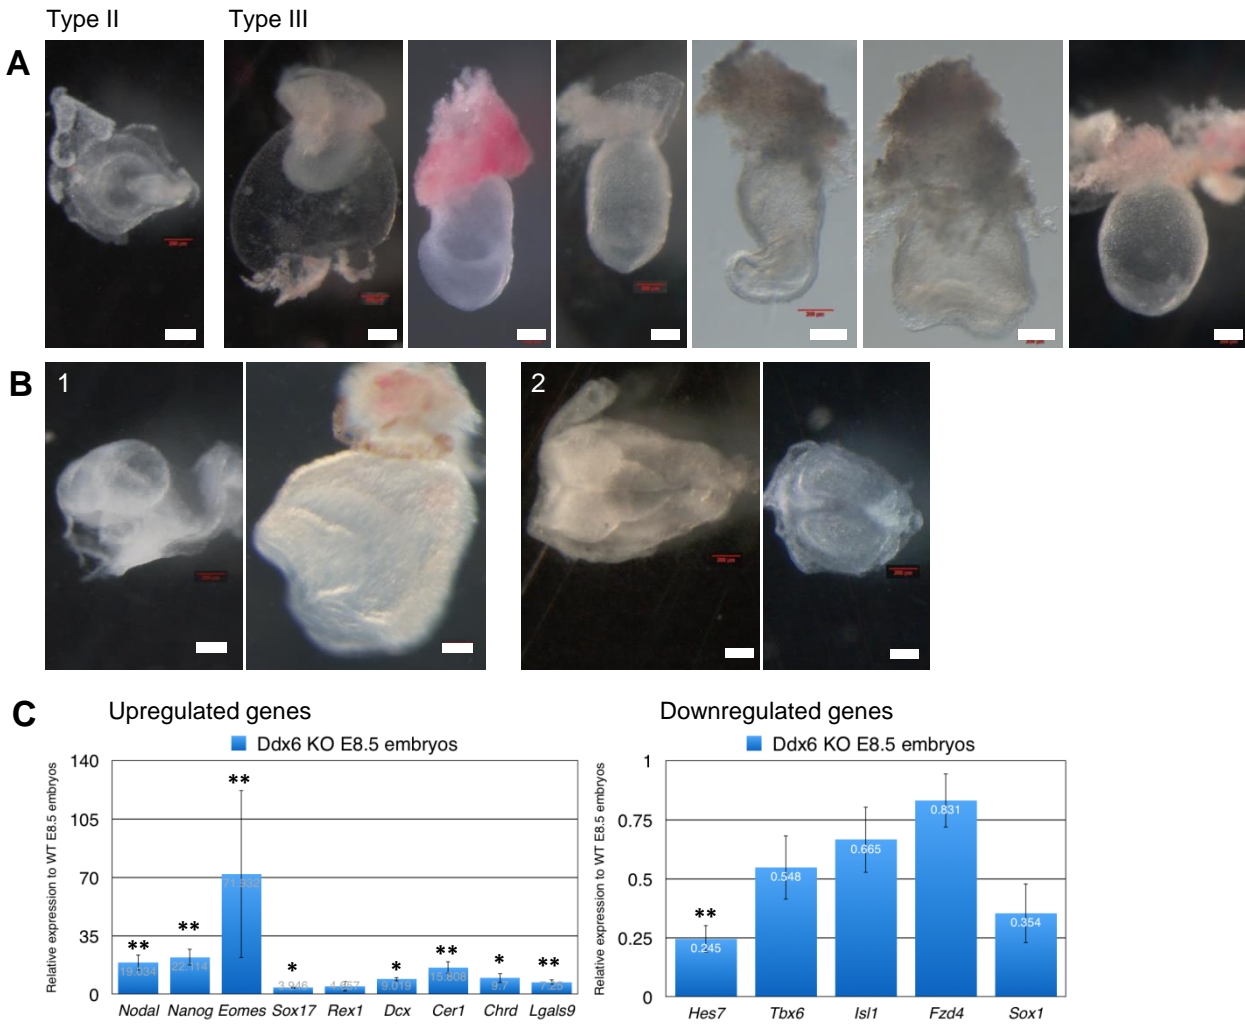

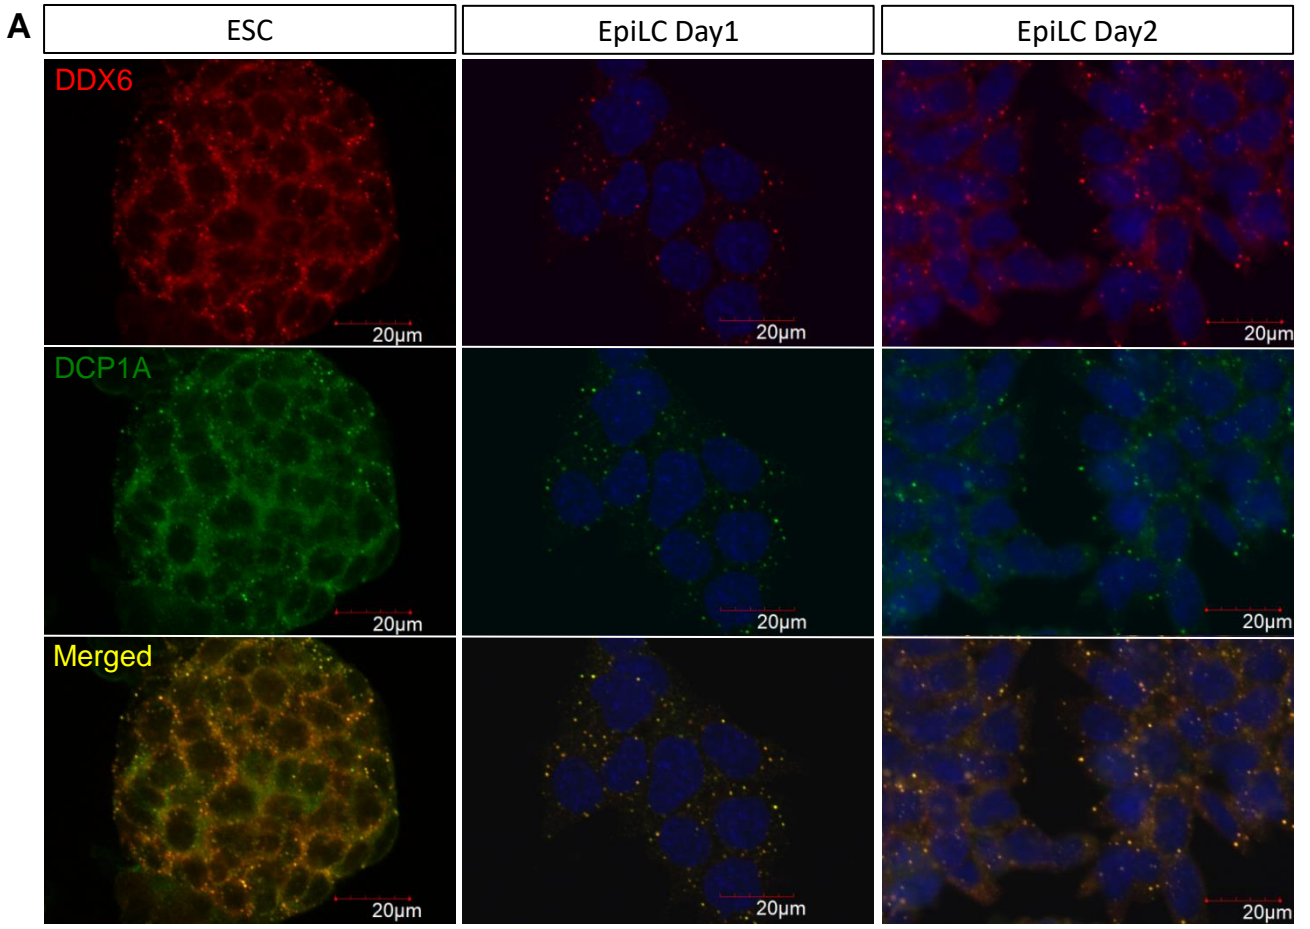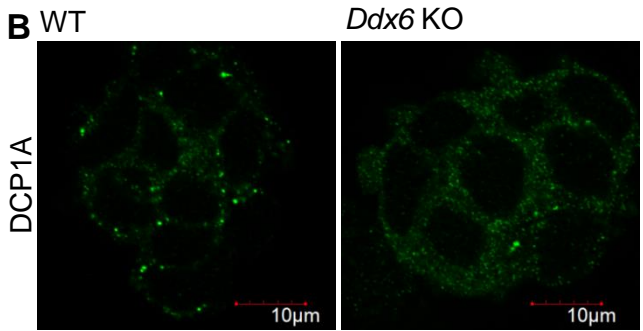

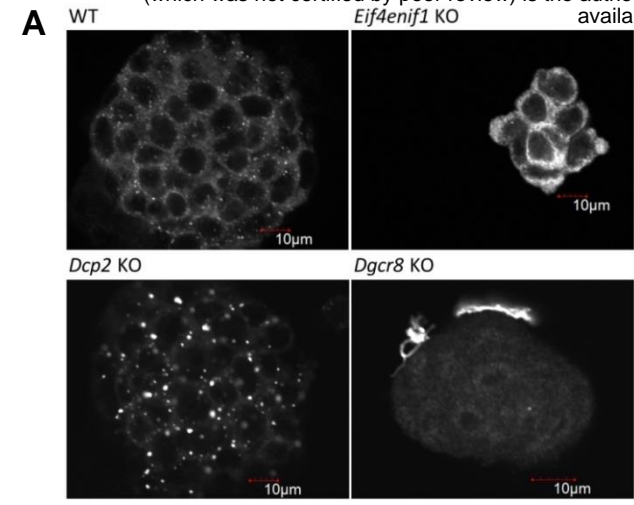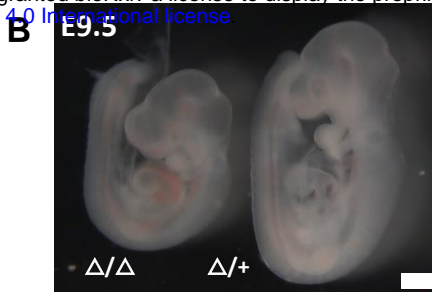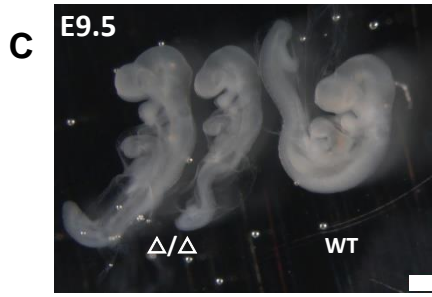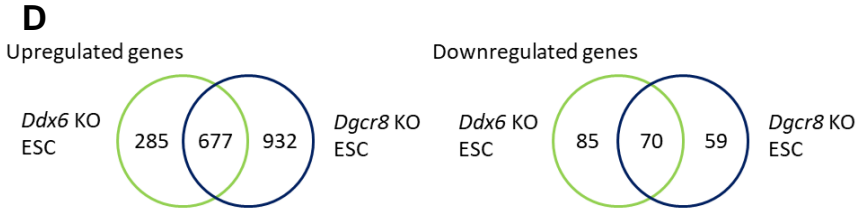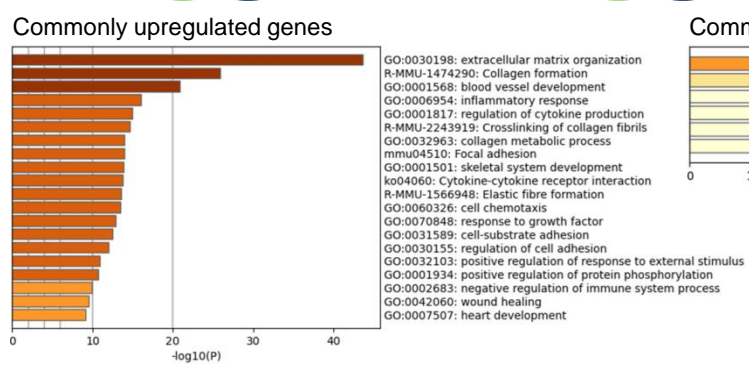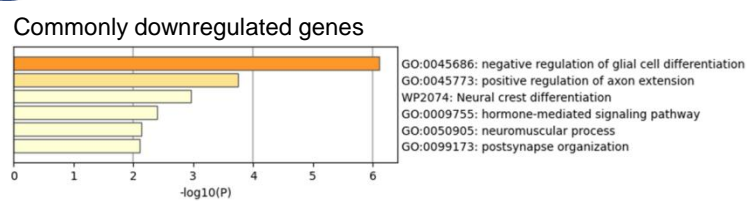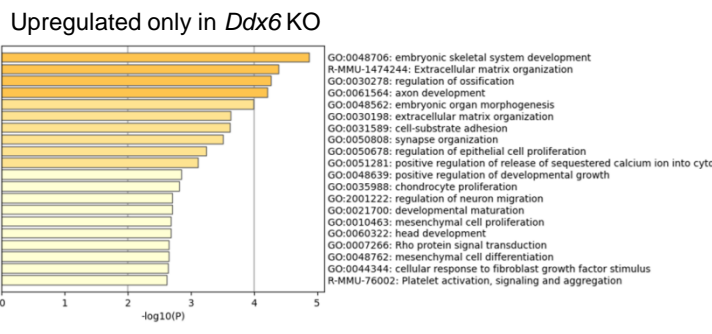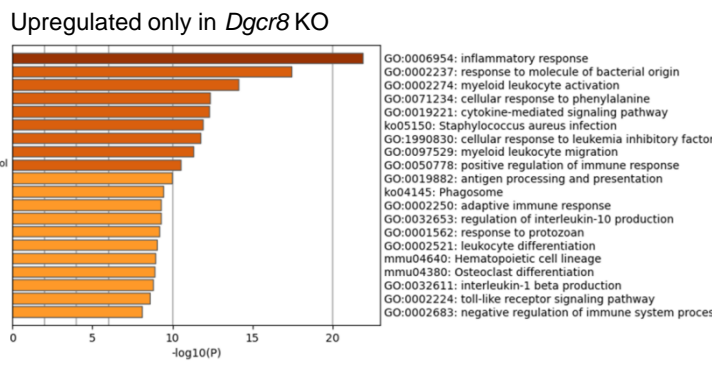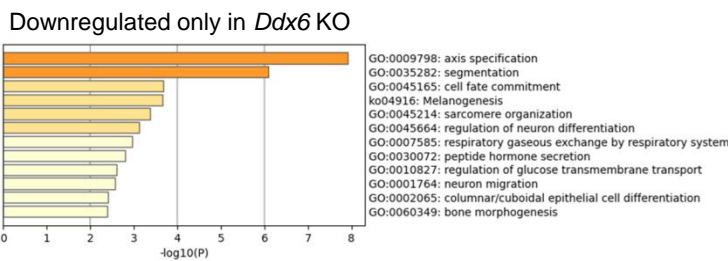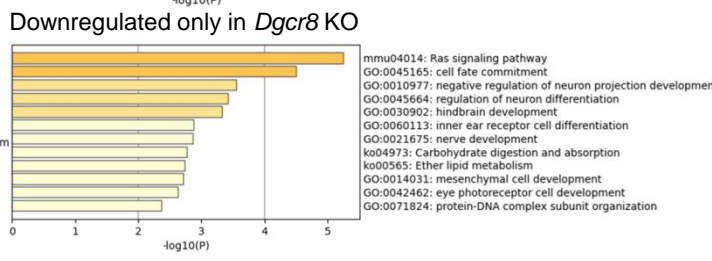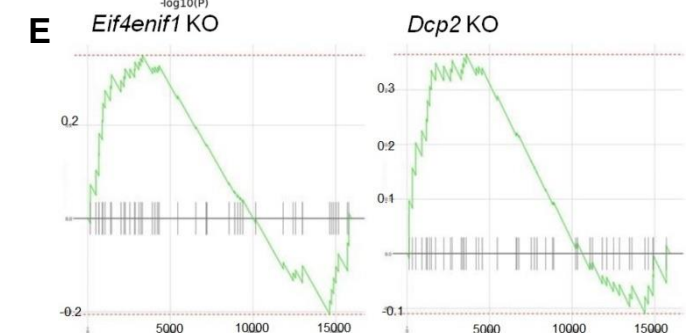

|                     | p-adjusted | Normalized enrichment score |
|---------------------|------------|-----------------------------|
| <i>Ddx6</i> KO      | 0.001496   | 1.906797                    |
| <i>Dgcr8</i> KO     | 0.00276    | 1.848863                    |
| <i>Eif4enif1</i> KO | 0.555909   | 1.107429                    |
| <i>Dcp2</i> KO      | 0.542614   | 1.127066                    |

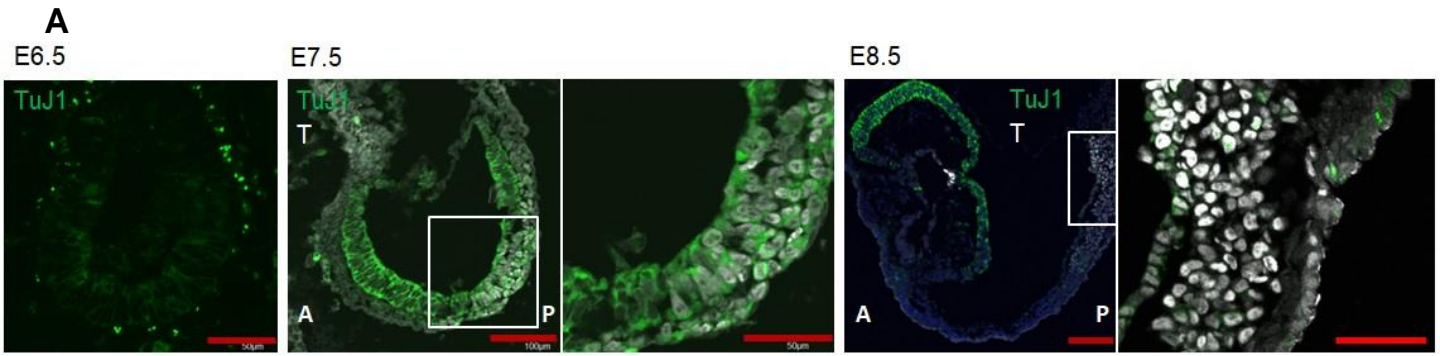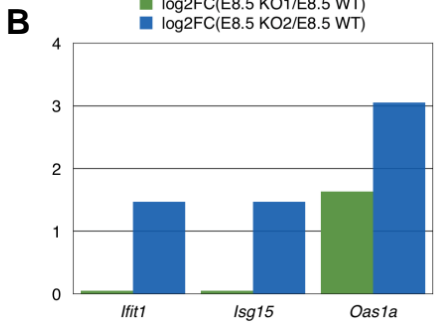

Source: https://www.biorxiv.org/content/10.1101/2021.11.29.470397v1.full.pdf
